# Supplementary material for: Assessing glycolytic flux alterations resulting from genetic perturbations in E. coli using a biosensor
Source: PubMed Central journal article supplement — Metab Eng. 2017 Jul;42:194–202. doi: 10.1016/j.ymben.2017.07.002 (PMC5555440; doi:10.1016/j.ymben.2017.07.002), 2017-07
Supplement: mmc1.pdf [file mmc1.pdf]

Supporting information to

## Assessing glycolytic flux alterations resulting from genetic perturbations in *E. coli* using a biosensor

Christina E. Lehning, Solvej Siedler, Mostafa M. H. Ellabaan, Morten O. A. Sommer\*

Table S1 DNA oligo sequences for cloning

Abbreviations: -p: promoter region; BSsc: scrambled Cra-binding site

| Primer name              | Sequence 5'-3'                          | Description               |
|--------------------------|-----------------------------------------|---------------------------|
| <b>Promoter regions</b>  |                                         |                           |
| PC028                    | AACCATUAATACCGCCATTTGG                  | <i>pfkA</i> -p forw       |
| PC029                    | AGTTCTTCTCCUTTGTCTCATGACTACCTCTGAACTTTG | <i>pfkA</i> -p rev        |
| PC033                    | AACCATUCAACGCTGGGATC                    | <i>ppsA</i> -p forw       |
| PC048                    | AGTTCTTCTCCUTTGTCTCATCGAACAATCCTTTTGTG  | <i>ppsA</i> -p rev        |
| PC035                    | AACCATUGACGTAAATTCCTG                   | <i>ppc</i> -p forw        |
| PC049                    | AGTTCTTCTCCUTTGTCTCATATTACCCAGACACC     | <i>ppc</i> -p rev         |
| PC063                    | ATTACTGGGUCGACGTTTTTTTCATCCGGT          | <i>ppsA</i> -p BSsc forw  |
| PC064                    | ACCCAGTAAUAGTCATATATTTTTTTACTTTTTAAGAC  | <i>ppsA</i> -p BSsc rev   |
| <b>Genes</b>             |                                         |                           |
| PC019                    | AGGAGAAGAACUTTTCACTGGAG                 | <i>gfp</i> forw           |
| PC021                    | ATTTGUAGAGCTCATCCATGCC                  | <i>gfp</i> rev            |
| PC069                    | ACGACCUGCAGGGAGCAG                      | <i>mCherry</i> w term rev |
| PC070                    | ATGGTTUCCAAGGGCGAG                      | <i>mCherry</i> forw       |
| <b>Backbone assembly</b> |                                         |                           |
| PC004                    | AATGGTUTCTTAGACGTC                      | p15A rev 1                |
| PC031                    | ACAAAUGATAGAGGCATCA                     | p15A forw 1               |
| PC055                    | ACTCTUCCTTTTTCAATATT                    | p15A forw 2               |
| PC073                    | AACTGUACAACCTATATCGTATGGG               | p15A forw 2               |
| PC057                    | AAGAGUATGCCTCGGGCA                      | Sm/Sp resist. forw        |
| PC060                    | ACAGTUATTTGCCGACTAC                     | Sm/Sp resist. rev         |
| PC065                    | AAACCAUCGAACAATCCTTTTGTG                | p15A forw 3               |
| PC071                    | AGGTCGUGTCCTACTCAGGAG                   | p15A rev 3                |
| PC072                    | AATGGTUGCGCTAGCGGAG                     | p15A forw 4               |

Table SII **Plasmid list**

Abbreviations: -*p*: promoter region; BSc: scrambled Cra-binding site

| Name     | Description                                                             | Source                       |
|----------|-------------------------------------------------------------------------|------------------------------|
| pZA11MCS | p15A ori; ampicillin res. (amp), P <sub>LtetO-1</sub> promoter, MCS     | (Lutz, 1997)                 |
| pZA14MCS | p15A ori; spectinomycin res. (spec), P <sub>LtetO-1</sub> promoter, MCS | this study                   |
| pGFPppsA | pZA4 + <i>ppsA-p_gfp</i>                                                | this study                   |
| pGFPppc  | pZA4 + <i>ppc-p_gfp</i>                                                 | this study                   |
| pGFPpykF | pZA4 + <i>pykF-p_gfp</i>                                                | this study                   |
| pFlux    | pZA4 + <i>ppsA-p_gfp</i> + <i>ppsA-BSc_mCherry</i>                      | this study                   |
| pMevT    | Mevalonate production pathway                                           | (Martin <i>et al</i> , 2003) |

Table SIII **List of Bacterial strains**

| Name         | Description/Genotype                                                                                                                                                                                                         | Source                  |
|--------------|------------------------------------------------------------------------------------------------------------------------------------------------------------------------------------------------------------------------------|-------------------------|
| Top10        | F <sup>-</sup> mcrA Δ(mrr-hsdRMS-mcrBC) φ80lacZΔM15 ΔlacX74 nupG recA1 araD139 Δ(ara-leu)7697 galE15 galk16 rpsL(Str <sup>R</sup> ) endA1 λ <sup>-</sup>                                                                     | Invitrogen              |
| DH5α         | F <sup>-</sup> <i>endA1 glnV44 thi-1 recA1 relA1 gyrA96 deoR nupG purB20</i> φ80dlacZΔM15 Δ( <i>lacZYA-argF</i> )U169, <i>hsdR17(r<sub>K</sub><sup>-</sup> m<sub>K</sub><sup>+</sup>)</i> , λ <sup>-</sup>                   | Invitrogen              |
| BW25113      | <i>lacI<sup>+</sup>rrnB<sub>T14</sub> ΔlacZ<sub>WJ16</sub> hsdR514 ΔaraBAD<sub>AH33</sub> ΔrhaBAD<sub>LD78</sub> rph-1 Δ(araB-D)567 Δ(rhaD-B)568 ΔlacZ4787(::rrnB-3) hsdR514 rph-1</i>                                       | Baba <i>et al.</i> 2006 |
| Δ <i>cra</i> | BW25113 JW0078-1, Δ <i>cra</i> (Δ <i>fruR</i> )                                                                                                                                                                              | Baba <i>et al.</i> 2006 |
| BL21(DE3)    | F <sup>-</sup> <i>ompT gal dcm lon hsdS<sub>B</sub>(r<sub>B</sub><sup>-</sup>m<sub>B</sub><sup>-</sup>)</i> λ(DE3 [ <i>lacI lacUV5-T7p07 ind1 sam7 nin5</i> ]) [ <i>malB<sup>+</sup></i> ] <sub>K-12</sub> (λ <sup>S</sup> ) | Agilent                 |
| MG1655       | K-12 F <sup>-</sup> λ <sup>-</sup> <i>ilvG<sup>-</sup> rfb-50 rph-1</i>                                                                                                                                                      | ATCC                    |
| W3110        | F <sup>-</sup> λ <sup>-</sup> <i>rph-1 INV(rrnD, rrnE)</i>                                                                                                                                                                   | Monk <i>et al.</i> 2016 |
| Crooks       | ATCC 8739                                                                                                                                                                                                                    | Monk <i>et al.</i> 2016 |

Table SIV DNA sequences of the promoter regions. The Cra binding site is highlighted in green, the -35 region in dark gray, the -10 region in light gray and the transcription start site in blue.

| ppsA promoter region                                                                                                                                                                                                                                                                                                                                    |
|---------------------------------------------------------------------------------------------------------------------------------------------------------------------------------------------------------------------------------------------------------------------------------------------------------------------------------------------------------|
| CAACGCTGGGATCAGTCTTAAAAAGTAAAAAATATATTTGCTTGAACGATTCACTGTTTTTTCATCCGGTTAAATATGCAAAGATAAATGCGCAGAAATGTGTTCTCAAACCGTTCATTTATCACAAAAGGATTGTTTCG                                                                                                                                                                                                            |
| ppc promoter region                                                                                                                                                                                                                                                                                                                                     |
| GACGTAAATTCCTGCTATTTATTCGTTTGCTGAAGCGATTTCGCAGCATTGACGTCACCGCTTTTACGTGGCTTTATAAAAAGACGACGAAAAGCAAAGCCCGAGCATA TTCGCGCAATGCGACGTGAAGGATACAGGGCTATCAAACGATAAGATGGGGTGTCTGGGGTAAT                                                                                                                                                                          |
| pykF promoter region                                                                                                                                                                                                                                                                                                                                    |
| CGTAACCTTTCCCTGGAACGTTAAATCTTTGATAACAATTTATTGTCTAACCAAGTTGTATATTTTTGAAACGCTGTTTTGTTTTCTTTTGGATTAATTCAGCGTATA ATGCGCGCCAATTGACTCTTGAATGGTTTCAGCACTTTGGACTGTAGAACTCAACGACTCAAAAACAGGCACTCACGTTGGGCTGAGACACAAGCACACATTCTCTGCACGCTTTTCGATGTCACCTATCCTTAGAGCGAGGCACCACCACCTTCGTAATACCGGATTGCGTTTCCGGCAGTGCGCCAGAAAGCAAGTTTCTCCCATCCTTCTCACTTAAAGACTAAGACTGTC |

Table SIII DNA sequence of the pps and pps\_scr promoter. TS= transcription start site

pps ATTTGCTTGAACGATTCACTGTTTTTTTCATCCGGTTAAATATGCAAAGATAAATGCGCAGAAATGTGTTTCTCAAACCGTTCATTTATCACAAAAGGATTGTTTCGATG - gfp  
 pps\_scr ATGACTATTACTGGGTCGACGTTTTTTTCATCCGGTTAAATATGCAAAGATAAATGCGCAGAAATGTGTTTCTCAAACCGTTCATTTATCACAAAAGGATTGTTTCGATG - rfp

Cra binding site / scrambled
-35
-10
TS

Table SVI: blastn parameters considered in this study

| Parameter       | Value         | Comment                                                                |
|-----------------|---------------|------------------------------------------------------------------------|
| word_size       | 4             | To match small sequences                                               |
| evaluate        | 1000          | To match small sequences                                               |
| num_threads     | 28            | To fully utilize the machine                                           |
| max_target_seqs | Exp_read_size | Number of reads in Experiment: to get as much as possible of the reads |

**Table SVII: List of 504 identified genes with a count threshold  $\geq 10$  in the original library. The genes are ordered by gene name.**

| Gene name | Locus tag | Function                                                                         | 1 %<br>low<br>flux | 5 %<br>low<br>flux | 1 %<br>high<br>flux | 5 %<br>high<br>flux |
|-----------|-----------|----------------------------------------------------------------------------------|--------------------|--------------------|---------------------|---------------------|
| abgT      | P46133    | Putative transport; Not classified                                               | 0                  | 1.66               | 3.35                | 3.74                |
| aceA      | P0A9G6    | Enzyme; Central intermediary metabolism: Glyoxylate bypass                       | 0.98               | 1.31               | 0                   | 0                   |
| aceB      | P08997    | Enzyme; Central intermediary metabolism: Glyoxylate bypass                       | 1.36               | 0.35               | 0                   | 0                   |
| aceK      | P11071    | Enzyme; Central intermediary metabolism: Glyoxylate bypass                       | 3.95               | 2.43               | 0                   | 0                   |
| adhE      | b1241     | Enzyme; Energy metabolism, carbon: Fermentation                                  | 0.42               | -0.75              | -0.66               | 0.44                |
| adhP      | P39451    | Enzyme; Energy metabolism, carbon: Anaerobic respiration                         | 3.87               | 3.73               | 0                   | 0                   |
| aer       | P50466    | Regulator; Degradation of small molecules: Carbon compounds                      | 0.18               | -0.96              | -0.23               | -0.96               |
| alsC      | P32720    | Putative transport; Not classified                                               | 0                  | -1.95              | 0                   | 0                   |
| alsK      | P32718    | Putative regulator; Not classified                                               | 2.94               | 3.48               | 0                   | 0.15                |
| ampD      | P13016    | Regulator; Not classified                                                        | 0                  | -1.65              | 0                   | 0                   |
| ansB      | P00805    | Enzyme; Degradation of small molecules: Amino acids                              | 0.17               | -1.18              | -0.31               | -0.1                |
| apt       | P69503    | Enzyme; Salvage of nucleosides and nucleotides                                   | 0.51               | 1.96               | 1.71                | 0.53                |
| araE      | P0AE24    | Transport; Transport of small molecules: Carbohydrates, organic acids, alcohols  | -0.57              | -0.16              | 1.27                | 0.86                |
| aroG      | P0AB91    | Enzyme; Amino acid biosynthesis: Phenylalanine                                   | 0                  | -0.14              | 0.03                | 0.92                |
| arpA      | P23325    | Null                                                                             | 1.82               | 1.67               | 1.94                | 0.11                |
| arsB      | P0AB93    | Transport; Drug/analog sensitivity                                               | 0.42               | -0.23              | -0.01               | -0.55               |
| arsC      | P0AB96    | Enzyme; Drug/analog sensitivity                                                  | -0.06              | -0.91              | -0.55               | -0.78               |
| artQ      | P0AE34    | Transport; Transport of small molecules: Amino acids, amines                     | -0.51              | 0                  | 0                   | 0                   |
| asd       | P0A9Q9    | Enzyme; Amino acid biosynthesis: Lysine                                          | 1.13               | 0.95               | -0.25               | 0                   |
| asnA      | P00963    | Enzyme; Amino acid biosynthesis: Asparagine                                      | 0.02               | -0.65              | -0.47               | -1.01               |
| asr       | P36560    | Phenotype; Not classified                                                        | 0.77               | 2.22               | 0                   | 0                   |
| atpA      | P0ABB0    | Enzyme; ATP-proton motive force interconversion                                  | -0.02              | -0.64              | 0.06                | 0.01                |
| atpB      | P0AB98    | Enzyme; ATP-proton motive force interconversion                                  | 0.54               | 0.16               | 0.56                | -0.46               |
| atpG      | P0ABA6    | Enzyme; ATP-proton motive force interconversion                                  | 0.5                | 0.23               | 0.43                | -1.02               |
| bcr       | P28246    | Transport; Drug/analog sensitivity                                               | 0.34               | 0.31               | 0.37                | 0.89                |
| bcsC      | P37650    | Putative enzyme; Not classified                                                  | 0.03               | 0.46               | 0.24                | -1.5                |
| bcsG      | P37659    | Null                                                                             | 0.39               | -0.16              | -0.75               | -1.26               |
| bdm       | P76127    | Null                                                                             | -0.05              | -0.24              | 0                   | -1.31               |
| betB      | P17445    | Enzyme; Osmotic adaptation                                                       | 0.33               | -0.12              | 0                   | -1.58               |
| cadA      | P0A9H3    | Enzyme; Degradation of small molecules: Amino acids                              | 0                  | -2.13              | 0                   | 0                   |
| caiE      | P39206    | Putative enzyme; Central intermediary metabolism: Pool, multipurpose conversions | 0                  | 0.45               | 0                   | 0                   |

|      |        |                                                                                     |       |       |       |       |
|------|--------|-------------------------------------------------------------------------------------|-------|-------|-------|-------|
| ccmC | P0ABM1 | Transport; Protein, peptide secretion                                               | -0.81 | 0     | 0     | 0     |
| ccmD | P0ABM5 | Transport; Protein, peptide secretion                                               | -3.77 | -1.75 | 0.45  | 0.25  |
| cfa  | P0A9H7 | Enzyme; Fatty acid and phosphatidic acid biosynthesis                               | 0.94  | 0.71  | 0     | 0     |
| chbG | P37794 | Enzyme; Degradation of small molecules: N,N'-diacetylchitobiose                     | 2.62  | 2.31  | 0     | 0     |
| cheR | P07364 | Enzyme; Chemotaxis and mobility                                                     | 2.92  | 0.14  | 0     | 0     |
| cheW | P0A964 | Regulator; Chemotaxis and mobility                                                  | 2.02  | 1.15  | 0     | 0     |
| chiA | P13656 | Putative enzyme; Not classified                                                     | -0.56 | 0.11  | 0     | 0.09  |
| citA | P77510 | Regulator; Degradation of small molecules: Carbon compounds                         | 1.32  | 0.28  | 0.44  | 1.25  |
| citB | P0AEF4 | Regulator; Degradation of small molecules: Carbon compounds                         | 0     | -0.97 | 0     | -1.39 |
| citC | P77390 | Enzyme; Central intermediary metabolism: Pool, multipurpose conversions             | -0.15 | -0.44 | -0.1  | -0.38 |
| clcA | P37019 | Transport; Not classified                                                           | -0.05 | 0.06  | 0     | 0     |
| clpS | P0A8Q6 | Null                                                                                | 0     | -1.42 | 0     | 0     |
| cobS | P36561 | Enzyme; Biosynthesis of cofactors, carriers: Cobalamin                              | -4.01 | -3.6  | -1.78 | -0.61 |
| cpdA | P0AEW4 | Regulator; Degradation of small molecules: Carbon compounds                         | -0.23 | 0.61  | 2.53  | 0     |
| cpsB | P24174 | Enzyme; Central intermediary metabolism: Sugar-nucleotide biosynthesis, conversions | -0.12 | -0.43 | 0.18  | 0.61  |
| cpsG | P24175 | Enzyme; Central intermediary metabolism: Pool, multipurpose conversions             | -1.3  | -0.73 | -0.45 | 0     |
| cpxA | P0AE82 | Putative regulator; Global regulatory functions                                     | 0.31  | 1.19  | 1.68  | 0.19  |
| creC | P08401 | Enzyme; Global regulatory functions                                                 | 0     | -2.23 | 0     | 0     |
| csiE | P54901 | Null                                                                                | 0.14  | 0.43  | -0.37 | -1.25 |
| csiR | P37338 | Regulator; Not classified                                                           | -1.86 | -0.94 | -1.46 | 0     |
| cynR | P27111 | Regulator; Central intermediary metabolism: Pool, multipurpose conversions          | 0.7   | 1.24  | 0     | 0     |
| dadA | P0A6J5 | Enzyme; Degradation of small molecules: Amino acids                                 | -0.31 | -0.31 | -0.1  | 0.16  |
| dapB | P04036 | Enzyme; Amino acid biosynthesis: Lysine                                             | 0.03  | 0.07  | 0     | 0     |
| dcp  | P24171 | Enzyme; Degradation of proteins, peptides, glyco                                    | 2.26  | 1.68  | 0     | 0     |
| dcuC | P0ABP3 | Transport; Transport of small molecules: Carbohydrates, organic acids, alcohols     | 2.94  | 3.48  | 0     | 0.15  |
| ddlB | P07862 | Enzyme; Murein sacculus, peptidoglycan                                              | 0     | -0.93 | 0     | -1.59 |
| ddpX | P77790 | Null                                                                                | -0.43 | 1.42  | 0.4   | 0     |
| deoC | P0A6L0 | Enzyme; Salvage of nucleosides and nucleotides                                      | 1.1   | 1.2   | 0.16  | -0.7  |
| dsbA | P0AEG4 | Enzyme; Proteins - translation and modification                                     | 0     | -0.45 | -0.29 | 0     |
| dusB | P0ABT5 | Enzyme; tRNA modification                                                           | 2.74  | 2.12  | 0     | -1.6  |
| eamA | P31125 | Null                                                                                | -0.21 | 0.46  | 0     | 0     |
| ecnA | P0ADB4 | Null                                                                                | 0.05  | 0.39  | 0.09  | 0.41  |
| elbA | P75987 | Null                                                                                | -0.2  | 0     | 0     | 0     |
| envY | P10805 | Structural component; Outer membrane constituents                                   | 1.95  | 1.73  | 0     | -1.46 |
| etp  | P0ACZ2 | Enzyme; Not classified                                                              | 0.27  | -0.44 | 0.24  | 0.8   |

|      |        |                                                                                 |       |       |       |       |
|------|--------|---------------------------------------------------------------------------------|-------|-------|-------|-------|
| eutG | P76553 | Putative enzyme; Degradation of small molecules: Amines                         | -1.14 | 0.26  | -0.42 | -0.97 |
| eutQ | P76555 | Putative enzyme; Not classified                                                 | -0.23 | -1.21 | -0.45 | -0.61 |
| eutT | P65643 | Null                                                                            | -0.31 | -0.78 | -0.09 | -0.07 |
| fabF | P0AAI5 | Enzyme; Fatty acid and phosphatidic acid biosynthesis                           | -0.31 | 0     | 0     | 0     |
| fadB | P21177 | Enzyme; Degradation of small molecules: Fatty acids                             | 0.53  | -0.7  | 0     | 0.32  |
| fdnG | P24183 | Enzyme; Energy metabolism, carbon: Anaerobic respiration                        | -0.37 | 0.91  | 0     | 0     |
| fepE | P26266 | Transport; Transport of small molecules: Cations                                | 0     | 0.63  | 0     | 0     |
| fhiA | Q47153 | Null                                                                            | 0     | 0.09  | 0     | 0     |
| fimC | P31697 | Factor; Surface structures                                                      | -1.57 | -0.58 | -1.62 | -0.18 |
| fimG | P08190 | Structural component; Surface structures                                        | 0     | -1.77 | 0     | 0     |
| fkpA | P45523 | Enzyme; Proteins - translation and modification                                 | -0.45 | -0.05 | -0.69 | -2.02 |
| flgD | P75936 | Putative structure; Surface structures                                          | -1.72 | 0.26  | 0.14  | -0.85 |
| flgG | P0ABX5 | Structural component; Surface structures                                        | 1.66  | 1.69  | 0.37  | -0.31 |
| flgI | P0A6S3 | Putative structural component; Surface structures                               | 0.76  | 0.24  | -2.71 | -0.56 |
| flgK | P33235 | Structural component; Surface structures                                        | 2.2   | 2.59  | 0     | 0     |
| fliB | P76299 | Structural component; Not classified                                            | 3.07  | 2.18  | 0     | 0     |
| fliD | P24216 | Putative structure; Surface structures                                          | -0.36 | -0.53 | -0.82 | -0.45 |
| fliG | P0ABZ1 | Structural component; Surface structures                                        | 0.47  | 0.06  | 0     | -1.21 |
| fliH | P31068 | Transport; Surface structures                                                   | 0.07  | -0.01 | 0.12  | 0.09  |
| fliM | P06974 | Structural component; Surface structures                                        | 3.22  | 2.01  | 0     | 0     |
| fliO | P22586 | Putative structure; Surface structures                                          | 2.98  | 2.38  | -0.48 | 0.01  |
| fliP | P0AC05 | Putative structure; Surface structures                                          | 1.75  | 1.17  | 0     | 0     |
| fliQ | P0AC07 | Putative structure; Surface structures                                          | -0.75 | -0.05 | 0.39  | -0.46 |
| fliS | P26608 | Regulator; Surface structures                                                   | 1.01  | 0.14  | 0     | 0     |
| fliZ | P52627 | Structural component; Unknown                                                   | -0.03 | -0.83 | -0.81 | -0.61 |
| frdA | P00363 | Enzyme; Energy metabolism, carbon: Anaerobic respiration                        | 0.8   | 0     | 0     | 0     |
| frmB | P51025 | Enzyme; Formaldehyde degradation                                                | -0.34 | 0.76  | 0     | 0.54  |
| frvR | P32152 | Putative regulator; Not classified                                              | 0.09  | -0.23 | -0.05 | 0.05  |
| fsaA | P78055 | Null                                                                            | 2.88  | 2.45  | 0.58  | 0     |
| galM | P0A9C3 | Enzyme; Central intermediary metabolism: Pool, multipurpose conversions         | -0.42 | -0.32 | -0.11 | -0.22 |
| galR | P03024 | Regulator; Degradation of small molecules: Carbon compounds                     | -0.74 | 1.6   | -2.14 | -0.73 |
| galS | P25748 | Regulator; Degradation of small molecules: Carbon compounds                     | 0.28  | 2     | -2.82 | -0.86 |
| gapC | P33898 | Null                                                                            | 0     | -2.52 | 0     | 0     |
| gatA | P69828 | Enzyme; Transport of small molecules: Carbohydrates, organic acids, alcohols    | 2.94  | 3.48  | 0     | 0.15  |
| gatC | P69831 | Transport; Transport of small molecules: Carbohydrates, organic acids, alcohols | 3.66  | 3.28  | 0     | 0     |
| gatZ | P0C8J8 | Putative enzyme; Not classified                                                 | 0.6   | 0.57  | 0     | 0     |

|      |        |                                                                                     |       |       |       |       |
|------|--------|-------------------------------------------------------------------------------------|-------|-------|-------|-------|
| glnG | POAFB8 | Regulator; Amino acid biosynthesis: Glutamine                                       | -0.74 | 0.22  | 0     | 0     |
| glpD | P13035 | Enzyme; Energy metabolism, carbon: Aerobic respiration                              | 1.24  | 0.13  | -0.36 | -0.76 |
| gltX | P04805 | Enzyme; Aminoacyl tRNA synthetases, tRNA modification                               | 0.04  | -0.64 | -0.54 | -1.47 |
| gpp  | P25552 | Enzyme; Global regulatory functions                                                 | -0.52 | -0.34 | -0.09 | -1.5  |
| gspH | P41443 | Putative transport; Not classified                                                  | -0.29 | -0.76 | -0.35 | -0.37 |
| gspJ | P45761 | Putative transport; Not classified                                                  | 0.3   | -0.34 | 0.3   | -0.89 |
| gst  | POA9D2 | Enzyme; Biosynthesis of cofactors, carriers: Thioredoxin, glutaredoxin, glutathione | 0.99  | -0.65 | 3.55  | 0.82  |
| gyrB | POAES6 | Enzyme; DNA - replication, repair, restriction/modification                         | -0.22 | -0.53 | -0.3  | -0.38 |
| hcr  | P75824 | Putative enzyme; Not classified                                                     | 0.22  | -0.74 | -0.08 | -1.07 |
| hdeB | POAET2 | Null                                                                                | 0     | 1.43  | 0     | -0.05 |
| hdeD | POAET5 | Null                                                                                | 0.21  | 0.01  | -0.66 | 0     |
| hemE | P29680 | Enzyme; Biosynthesis of cofactors, carriers: Heme, porphyrin                        | 0.85  | 0.04  | 0.52  | -0.3  |
| hemN | P32131 | Enzyme; Biosynthesis of cofactors, carriers: Heme, porphyrin                        | 0.17  | 0.74  | 0     | 0     |
| hipA | P23874 | Enzyme; Protein modification                                                        | 1.72  | 1.45  | -2.48 | 0     |
| hisH | P60595 | Enzyme; Amino acid biosynthesis: Histidine                                          | -0.84 | -0.72 | -0.15 | -1.23 |
| holC | P28905 | Enzyme; DNA - replication, repair, restriction/modification                         | -1.96 | 0.27  | -0.1  | -0.97 |
| hslV | POA7B8 | Enzyme; Degradation of proteins, peptides, glyco                                    | -1.69 | -2.59 | 0     | 0     |
| htrE | P33129 | Putative membrane; Surface structures                                               | 0     | -4.2  | -0.54 | -0.01 |
| hyaB | POACD8 | Enzyme; Energy metabolism, carbon: Aerobic respiration                              | -0.3  | -0.51 | 0     | 0     |
| hybE | POAAN1 | Phenotype; Energy metabolism, carbon: Anaerobic respiration                         | 0     | -0.86 | 0     | 0     |
| hybF | POA703 | Regulator; Energy metabolism, carbon: Anaerobic respiration                         | 0     | -1.78 | 0     | 0     |
| hycF | P16432 | Putative enzyme; Energy metabolism, carbon: Fermentation                            | 0     | 0.95  | 0     | 0     |
| hych | POAEV7 | Factor; Energy metabolism, carbon: Fermentation                                     | 1.02  | -1.16 | 0     | -0.63 |
| hyfD | P77416 | Enzyme; Energy metabolism, carbon: Anaerobic respiration                            | -1.87 | -0.57 | 0     | -1.18 |
| hyfJ | P77453 | Putative factor; Not classified                                                     | 1.46  | 0.79  | 0     | 0     |
| hyfR | P71229 | Putative regulator; Not classified                                                  | 1.11  | -0.4  | 1.08  | 0.21  |
| ilvB | P08142 | Enzyme; Amino acid biosynthesis: Isoleucine, Valine                                 | 2.23  | 1.13  | 0.97  | 0     |
| ilvN | POADF8 | Enzyme; Amino acid biosynthesis: Isoleucine, Valine                                 | 0.54  | -0.14 | 0     | -0.32 |
| imp  | P31554 | Phenotype; Adaptations, atypical conditions                                         | -1.09 | 0.6   | 0     | -0.78 |
| intF | P71298 | Phage or Prophage Related                                                           | 1.27  | 1.67  | -0.7  | 0     |
| kbaZ | POC8K0 | Putative enzyme; Not classified                                                     | 0.59  | -0.16 | -0.1  | 0.11  |
| kdpD | P21865 | Enzyme; Global regulatory functions                                                 | 0.55  | 0.96  | 0.25  | -0.23 |
| kdsC | POABZ4 | Null                                                                                | 0.08  | 0     | -0.16 | 0.59  |

|      |        |                                                                                 |       |       |       |       |
|------|--------|---------------------------------------------------------------------------------|-------|-------|-------|-------|
| lgt  | P60955 | Enzyme; Macromolecule synthesis, modification: Phospholipids                    | 0.89  | 0.51  | 1.05  | 1.4   |
| lit  | P11072 | Membrane; Phage or Prophage Related                                             | -2.72 | 0.59  | 0     | 0     |
| livM | P22729 | Transport; Transport of small molecules: Amino acids, amines                    | 0.4   | 0     | 0.08  | -1.26 |
| lsrD | P0AFS1 | Transport; Transport of small molecules: Carbohydrates, organic acids, alcohols | 1.13  | -1.17 | 0     | 0     |
| lysC | P08660 | Enzyme; Amino acid biosynthesis: Lysine                                         | -0.14 | -0.73 | -0.18 | -0.16 |
| mdfA | P0AEY8 | Transport; Transport of small molecules: Other                                  | 2.48  | 1.86  | -2.39 | -3.38 |
| mdlA | P77265 | Null                                                                            | -1.48 | 0     | 0     | 0     |
| mdlB | P0AAG5 | Null                                                                            | 1.82  | 0.75  | 0.65  | 0.55  |
| mdtA | P76397 | Putative membrane; Not classified                                               | 0.06  | -0.51 | 0.34  | -1.6  |
| menD | P17109 | Enzyme; Biosynthesis of cofactors, carriers: Menaquinone, ubiquinone            | -0.02 | -0.43 | 0.08  | 0.02  |
| menE | P37353 | Enzyme; Biosynthesis of cofactors, carriers: Menaquinone, ubiquinone            | 1.15  | 1.72  | 0     | 0     |
| metJ | P0A8U6 | Regulator; Amino acid biosynthesis: Methionine                                  | 0.45  | -0.23 | 0.19  | 0.18  |
| metL | P00562 | Enzyme; Amino acid biosynthesis: Methionine                                     | -0.96 | -0.08 | 0     | -0.31 |
| mgsA | P0A731 | Enzyme; Central intermediary metabolism: Pool, multipurpose conversions         | -0.2  | -0.42 | 0     | 0     |
| mhpD | P77608 | Enzyme; Degradation of small molecules: Carbon compounds                        | 1.56  | 0.14  | 0.69  | 0     |
| mhpR | P77569 | Regulator; Not classified                                                       | -0.44 | 1.51  | 0     | 0     |
| mhpT | P77589 | Putative transport; Not classified                                              | 2.76  | 2.54  | -2.45 | -2.38 |
| mngA | P54745 | Enzyme; Proteins - translation and modification                                 | 0     | 0.22  | 0     | 0     |
| molR | P33345 | Null                                                                            | 0     | -0.52 | 0     | 0     |
| mraW | P60390 | Enzyme; rRNA modification                                                       | -1.45 | -0.86 | 0     | 0     |
| mrcA | P02918 | Enzyme; Murein sacculus, peptidoglycan                                          | -0.54 | -0.13 | -0.33 | -1.46 |
| mrcB | P02919 | Enzyme; Murein sacculus, peptidoglycan                                          | 0.58  | -0.33 | 0.2   | -0.35 |
| mrp  | P0AF08 | Putative enzyme; Not classified                                                 | 0.3   | -0.94 | -0.2  | 0.2   |
| msrA | P0A744 | Enzyme; Proteins - translation and modification                                 | -0.13 | -1.14 | 0     | 0     |
| murD | P14900 | Enzyme; Murein sacculus, peptidoglycan                                          | -0.11 | -1.29 | -0.59 | -1.39 |
| mutT | P08337 | Enzyme; 2'-Deoxyribonucleotide metabolism                                       | -1.17 | -0.54 | 0     | -0.32 |
| nagA | P0AF18 | Enzyme; Central intermediary metabolism: Amino sugars                           | 0     | -3.25 | 0     | 0     |
| nagC | P0AF20 | Regulator; Central intermediary metabolism: Amino sugars                        | -3.09 | -2.02 | -0.41 | -0.11 |
| nagZ | P75949 | Null                                                                            | 1.34  | -0.71 | 0.65  | 0     |
| nanK | P45425 | Putative regulator; Not classified                                              | 3.85  | 2.98  | 0     | 0     |
| napD | P0A9I5 | Null                                                                            | 0     | -2.19 | 0     | 0     |
| nfo  | P0A6C1 | Enzyme; Degradation of DNA                                                      | 2.18  | -1.09 | 0     | 0     |
| nikC | P0AFA9 | Transport; Transport of small molecules: Cations                                | -0.22 | -0.8  | -0.65 | -1.44 |
| nlpB | P0A903 | Membrane; Macromolecule synthesis, modification: Lipoprotein                    | 0.14  | -0.2  | -0.08 | -0.5  |
| nohA | P31061 | Phage or Prophage Related                                                       | 1.72  | 1.08  | 0     | 0     |



|      |        |                                                                         |       |       |       |       |
|------|--------|-------------------------------------------------------------------------|-------|-------|-------|-------|
| nrdD | P28903 | Enzyme; 2'-Deoxyribonucleotide metabolism                               | 0     | 0.12  | 0     | 0     |
| ogt  | P0AFH0 | Enzyme; DNA - replication, repair, restriction/modification             | 0.95  | 0.14  | 0     | 0     |
| ompC | P06996 | Membrane; Outer membrane constituents                                   | -1.11 | -0.72 | 1.02  | 1.26  |
| oppD | P76027 | Transport; Not classified                                               | 1.5   | 0.85  | 0     | 0     |
| pcm  | P0A7A5 | Enzyme; Proteins - translation and modification                         | 2.95  | 2.69  | 0     | 0     |
| pepQ | P21165 | Enzyme; Degradation of proteins, peptides, glyco                        | -0.05 | -1.29 | 0.35  | -1.17 |
| pflD | P32674 | Enzyme; Energy metabolism, carbon: Anaerobic respiration                | -0.02 | -0.62 | -0.4  | -0.73 |
| pfs  | P0AF12 | Null                                                                    | -0.26 | -0.52 | 0.12  | -0.4  |
| phnA | P0AFJ1 | Null                                                                    | -0.4  | 0     | 0     | 0     |
| phnC | P16677 | Transport; Central intermediary metabolism: Phosphorus compounds        | 2.9   | 2.59  | 0     | -1.23 |
| phnG | P16685 | Enzyme; Central intermediary metabolism: Phosphorus compounds           | 1.13  | -1.09 | -0.05 | -0.16 |
| phnH | P16686 | Enzyme; Central intermediary metabolism: Phosphorus compounds           | 0.41  | -0.37 | 0     | 0     |
| phoA | P00634 | Enzyme; Central intermediary metabolism: Phosphorus compounds           | 0.63  | -1.51 | 0     | 0     |
| phoH | P0A9K1 | Regulator; Central intermediary metabolism: Phosphorus compounds        | 0.34  | 0.03  | -0.2  | 0.08  |
| phoU | P0A9K7 | Regulator; Global regulatory functions                                  | -0.06 | -0.48 | -1.24 | -2.33 |
| pncA | P21369 | Null                                                                    | -0.74 | 1     | 0.73  | 0.32  |
| pntA | P07001 | Enzyme; Central intermediary metabolism: Pool, multipurpose conversions | 0.53  | 0.44  | 0     | -0.66 |
| potB | P0AFK4 | Transport; Transport of small molecules: Amino acids, amines            | -0.21 | -1.7  | -0.31 | -0.28 |
| pphA | P55798 | Regulator; Not classified                                               | 0.67  | 0.66  | 0     | -0.94 |
| ppk  | P0A7B1 | Enzyme; Central intermediary metabolism: Phosphorus compounds           | 3.23  | 3.04  | 0.44  | 0     |
| psd  | P0A8K1 | Enzyme; Macromolecule synthesis, modification: Phospholipids            | -1    | -0.59 | 1.3   | 0     |
| purH | P15639 | Enzyme; Purine ribonucleotide biosynthesis                              | 0.43  | 0.03  | -0.12 | -1.15 |
| purR | P0ACP7 | Regulator; Purine ribonucleotide biosynthesis                           | 0.83  | 0.81  | -0.65 | -0.61 |
| pyrB | P0A786 | Enzyme; Pyrimidine ribonucleotide biosynthesis                          | -0.2  | 0     | 0     | 0     |
| paaC | P76079 | Enzyme; Phenylacetic acid degradation                                   | 0.1   | -0.4  | -0.65 | -1.42 |
| paaF | P76082 | Enzyme; Phenylacetic acid degradation                                   | 0.15  | -0.08 | 0.15  | -0.22 |
| paal | P76084 | Enzyme; Phenylacetic acid degradation                                   | 2.82  | 2.13  | 0.06  | -1.09 |
| qor  | P28304 | Enzyme; Energy metabolism, carbon: Electron transport                   | 0.12  | -0.23 | -0.4  | -0.27 |
| racR | P76062 | Phage or Prophage Related                                               | 0.1   | 0.35  | 0     | 0     |
| radA | P24554 | Putative enzyme; Degradation of proteins, peptides, glycopeptides       | -0.64 | -0.8  | 0     | 0     |
| rarA | P0AAZ4 | Putative enzyme; Not classified                                         | 1.07  | 1.99  | 0     | 0.43  |
| rbbA | P37624 | Putative transport; Not classified                                      | -0.21 | -0.55 | 0.34  | -0.23 |
| rbsC | P0AGI1 | Transport; Transport of small molecules:                                | -0.17 | -0.58 | -0.32 | -0.69 |

|      |        | Carbohydrates, organic acids, alcohols                                              |       |       |       |       |
|------|--------|-------------------------------------------------------------------------------------|-------|-------|-------|-------|
| rcsF | P69411 | Regulator; Surface polysaccharides & antigens                                       | 0     | -1.08 | 0     | 0     |
| rep  | P09980 | Enzyme; DNA - replication, repair, restriction/modification                         | 0.43  | -0.28 | 0     | -0.75 |
| rffG | P27830 | Enzyme; Central intermediary metabolism: Sugar-nucleotide biosynthesis, conversions | 0     | 0.46  | 0.09  | 0     |
| rimJ | POA948 | Enzyme; Ribosomes - maturation and modification                                     | 3.51  | 2.73  | 0     | 0     |
| rne  | P21513 | Enzyme; Degradation of RNA                                                          | -0.01 | -0.39 | -0.17 | -1.14 |
| rob  | POACIO | Factor; DNA - replication, repair, restriction/modification                         | -0.64 | 0.4   | 0     | 0.45  |
| rpe  | POAG07 | Enzyme; Central intermediary metabolism: Non-oxidative branch, pentose pathway      | 0.01  | 0.15  | -0.39 | 0     |
| rph  | P0CG19 | Enzyme; Degradation of RNA                                                          | 0.02  | -0.54 | -1.76 | 0     |
| rpiA | POA7Z0 | Enzyme; Central intermediary metabolism: Non-oxidative branch, pentose pathway      | -2.24 | -1.97 | 1.22  | 2.2   |
| rplW | POADZ0 | Structural component; Ribosomal proteins - synthesis, modification                  | -0.6  | -0.66 | -0.21 | -0.33 |
| rpmD | POAG51 | Structural component; Ribosomal proteins - synthesis, modification                  | -0.05 | 1.78  | 0     | 0.57  |
| rpmF | POA7N4 | Structural component; Ribosomal proteins - synthesis, modification                  | 0.31  | -0.87 | -0.43 | -1.49 |
| rseC | P46187 | Regulator; Global regulatory functions                                              | 0.2   | 0     | 0     | 0     |
| rssA | POAFR0 | Null                                                                                | 2.78  | 2.52  | 0     | 0     |
| rsuA | POAA43 | Enzyme; rRNA modification                                                           | 0.86  | 0     | 0.07  | 0     |
| rsxC | P77611 | Putative membrane; Not classified                                                   | 0     | 0.07  | 0     | 0.55  |
| sbcD | POAG76 | Enzyme; Degradation of DNA                                                          | 0     | 0     | 0     | -0.25 |
| secG | POAG99 | Transport; Protein, peptide secretion                                               | 0     | -2.71 | 0     | 0     |
| selD | P16456 | Enzyme; Aminoacyl tRNA synthetases, tRNA modification                               | 0.25  | 0.52  | 0     | 0     |
| sfmC | P77249 | Putative factor; Surface structures                                                 | 0.41  | 0.62  | 0     | -0.84 |
| sgbU | P37679 | Putative enzyme; Central intermediary metabolism: Pool, multipurpose conversions    | 0.57  | -0.15 | -0.08 | -0.13 |
| sgcB | P58035 | Null                                                                                | -1.08 | 0     | 0     | 0     |
| sgcQ | P39364 | Putative enzyme; Not classified                                                     | 0     | -0.47 | 0.36  | 1.16  |
| sgrR | P33595 | Transport; Not classified                                                           | 0     | -1.42 | 0     | 0     |
| slyA | POA8W2 | Regulator; Adaptations, atypical conditions                                         | 0.59  | -0.03 | -1.08 | 0.38  |
| slyX | POA8R4 | Null                                                                                | 0.51  | -0.06 | 0.08  | 0.32  |
| soxS | POA9E2 | Regulator; Global regulatory functions                                              | 0     | 0.54  | 0     | 0     |
| speB | P60651 | Enzyme; Central intermediary metabolism: Polyamine biosynthesis                     | 0     | -1    | -1.14 | 0     |
| ssnA | Q46812 | Putative structure; Not classified                                                  | 2.54  | 2.44  | 2.47  | 3     |
| ssuD | P80645 | Null                                                                                | 1.94  | 0.95  | -0.42 | 0     |
| stfQ | P77515 | Phage or Prophage Related                                                           | 3.07  | 2.67  | -0.17 | 0     |
| stfR | P76072 | Phage or Prophage Related                                                           | 3.07  | 2.67  | -0.17 | 0     |
| sucC | POA836 | Enzyme; Energy metabolism, carbon: TCA cycle                                        | 0.47  | 0.09  | 0.59  | 0.41  |

|      |        |                                                                                  |       |       |       |       |
|------|--------|----------------------------------------------------------------------------------|-------|-------|-------|-------|
| tam  | P76145 | Enzyme; Detoxification                                                           | 1     | -1.27 | 0     | 0     |
| tar  | P07017 | Regulator; Chemotaxis and mobility                                               | -1.38 | -0.8  | -1    | 0     |
| tdcD | P11868 | Putative enzyme; Not classified                                                  | -0.25 | -2.17 | 0     | 0     |
| tehB | P25397 | Enzyme; Drug/analog sensitivity                                                  | -0.5  | 0.17  | 0     | 0     |
| tesA | P0ADA1 | Enzyme; Fatty acid and phosphatidic acid biosynthesis                            | 1.19  | 0.73  | 0.89  | 1.27  |
| tesB | P0AGG2 | Enzyme; Fatty acid and phosphatidic acid biosynthesis                            | 0     | -0.01 | 0     | 0     |
| tfaD | P77699 | Phage or Prophage Related                                                        | -0.81 | -0.06 | -0.01 | 1.04  |
| tfaE | P09153 | Phage or Prophage Related                                                        | -0.34 | 0.33  | 0.19  | 0.59  |
| tfaS | P77326 | Phage or Prophage Related                                                        | -0.29 | 0.33  | 0.24  | 0.67  |
| this | O32583 | Factor; Biosynthesis of cofactors, carriers: Thiamine                            | -1.19 | -0.98 | 0     | 0     |
| tktA | P27302 | Enzyme; Central intermediary metabolism: Non-oxidative branch, pentose pathway   | -0.64 | -0.27 | 0.35  | 1.17  |
| tktB | P33570 | Enzyme; Central intermediary metabolism: Non-oxidative branch, pentose pathway   | -1.98 | -1.06 | -0.43 | -1.17 |
| tldD | P0AGG8 | Phenotype; Not classified                                                        | 0.91  | 0.4   | 0.79  | 0.43  |
| tmk  | P0A720 | Enzyme; 2'-Deoxyribonucleotide metabolism                                        | -0.51 | -1.6  | -0.43 | -1.2  |
| torS | P39453 | Enzyme; Energy metabolism, carbon: Anaerobic respiration                         | 0.36  | -0.27 | 0     | 0     |
| tpr  | P02338 | Factor; Basic proteins - synthesis, modification                                 | -0.64 | 0.85  | 0     | 0.51  |
| trg  | P05704 | Regulator; Chemotaxis and mobility                                               | -0.12 | 2     | 0     | 0     |
| trkH | P0AFZ7 | Transport; Transport of small molecules: Cations                                 | -0.51 | 0.47  | 0     | 0     |
| trxC | P0AGG4 | Putative enzyme; Not classified                                                  | -0.75 | 0.45  | 0     | 0     |
| uhpA | P0AGA6 | Regulator; Transport of small molecules: Carbohydrates, organic acids, alcohols  | -0.46 | -0.16 | -0.58 | -0.44 |
| ulaE | P39305 | Putative enzyme; Central intermediary metabolism: Pool, multipurpose conversions | 3.12  | 1.97  | 0.36  | 0.22  |
| ulaF | P39306 | Putative enzyme; Not classified                                                  | 2.19  | 1.16  | 0     | 0     |
| uup  | P43672 | Factor; DNA - replication, repair, restriction/modification                      | 0     | 0     | -0.26 | 0.29  |
| uxaA | P42604 | Enzyme; Degradation of small molecules: Carbon compounds                         | -0.64 | 0.72  | 0     | 0.97  |
| uxuB | P39160 | Enzyme; Degradation of small molecules: Carbon compounds                         | 2.59  | 2.71  | 0     | 0     |
| wbbI | P37749 | Enzyme; Lipopolysaccharide biosynthesis                                          | 0     | -1.27 | 0     | 0     |
| wcaA | P77414 | Putative regulator; Not classified                                               | 0.17  | -0.89 | 0     | 0     |
| wcaC | P71237 | Putative enzyme; Not classified                                                  | -0.55 | -1.26 | -0.62 | -0.21 |
| wcaI | P32057 | Putative enzyme; Not classified                                                  | -0.05 | -0.06 | 0     | 0     |
| wrbA | P0A8G6 | Enzyme; Not classified                                                           | -0.47 | -0.79 | -0.72 | -0.07 |
| wzc  | P76387 | Enzyme; Not classified                                                           | -0.37 | -0.07 | 0     | 0     |
| wzzE | P0AG00 | Putative transport; Not classified                                               | -1.6  | -0.91 | -0.76 | 0     |
| xerC | P0A8P6 | Enzyme; Cell division                                                            | 0     | 0.13  | -1.07 | -0.67 |
| yadD | P31665 | Null                                                                             | -1.19 | -0.78 | 0     | 0     |
| yafL | Q47151 | Putative membrane; Not classified                                                | 2.43  | 1.46  | 0     | 0     |
| yafM | Q47152 | Null                                                                             | -0.07 | 0.43  | 0     | 0     |

|      |        |                                                             |       |       |       |       |
|------|--------|-------------------------------------------------------------|-------|-------|-------|-------|
| yafN | Q47156 | Null                                                        | 1.81  | 1.53  | 0     | 0     |
| yafT | P77339 | Putative enzyme; Not classified                             | 3.17  | 2.21  | 0     | 0     |
| yafW | Q47684 | Phage or Prophage Related                                   | 0.82  | 0.13  | 0     | 0     |
| yagl | P77300 | Phage or Prophage Related                                   | -0.16 | -0.68 | -0.16 | -0.16 |
| yagM | P71296 | Phage or Prophage Related                                   | 2.75  | 2.09  | 0     | 0     |
| yagP | P75684 | Putative regulator; Not classified                          | 2.57  | 3.18  | 0     | 0     |
| yagU | P0AAA1 | Null                                                        | 1.1   | -1.18 | 0     | 0     |
| yagZ | P0AAA3 | Structural component; Surface structures                    | -0.22 | 1.15  | 0     | 0     |
| yahF | P77187 | Putative enzyme; Not classified                             | 1.22  | 0.36  | -0.26 | 0     |
| yahG | P77221 | Null                                                        | 1.23  | 0.96  | 0     | 0     |
| yahH | /      | #N/A                                                        | 1.21  | 0.83  | 0.64  | -0.28 |
| yahI | P77624 | Putative enzyme; Not classified                             | 1.12  | 2.16  | 1.73  | 0     |
| yahO | P75694 | Null                                                        | 0.71  | 2.39  | 0     | 0     |
| yaiF | P75697 | Null                                                        | 1.84  | -0.84 | 0     | 0     |
| yaiV | P0AAP5 | Null                                                        | 0     | -0.3  | 0     | 0     |
| ybaA | P0AAQ6 | Null                                                        | 0.93  | 1.44  | -1.4  | -1.65 |
| ybaB | P0A8B5 | Factor; DNA - replication, repair, restriction/modification | 0.66  | 0.63  | 1.01  | -0.07 |
| ybaL | P39830 | Putative transport; Not classified                          | 3.71  | 4     | 0     | 0     |
| ybaV | P0AAR8 | Null                                                        | -1.57 | 0     | 0     | 0     |
| ybaY | P77717 | Phenotype; Not classified                                   | 0.24  | -0.12 | 0.01  | -0.52 |
| ybbA | P0A9T8 | Putative transport; Not classified                          | 0     | -0.99 | 0     | 0     |
| ybbN | P77395 | Putative enzyme; Not classified                             | 0     | -0.1  | 0     | 0     |
| ybcD | P77528 | Phage or Prophage Related                                   | 1.86  | 0.57  | 0     | 0     |
| ybcV | P77598 | Phage or Prophage Related                                   | -0.33 | 0.99  | 0.69  | 1     |
| ybdM | P77174 | Null                                                        | 0.73  | 0.45  | -1.76 | -2.66 |
| ybdN | P77216 | Null                                                        | -0.76 | 0     | 0     | 0     |
| ybdZ | P18393 | Enzyme; Biosynthesis of cofactors, carriers: Enterochelin   | 0.15  | 0     | 0     | 0     |
| ybeA | P0A8I8 | Enzyme; rRNA modification                                   | 0     | -0.04 | 0     | 0     |
| ybeL | P0AAT9 | Phenotype; Not classified                                   | 2.44  | 0.86  | 0     | 0     |
| ybeX | P0AE78 | Putative transport; Not classified                          | -0.09 | -0.1  | 0.54  | -1.12 |
| ybgJ | P0AAV4 | Putative enzyme; Not classified                             | 0     | 0.25  | 0     | 0     |
| ybgO | P75748 | Null                                                        | 0     | -1.53 | 0     | 0     |
| ybhP | P0AAW1 | Null                                                        | 2.12  | 2.05  | -0.37 | 0     |
| ybiJ | P0AAX3 | Null                                                        | -0.17 | 0.38  | 0     | 0     |
| ybjD | P75828 | Null                                                        | -0.64 | 0.86  | 0     | 0     |
| ybjH | P0AAY4 | Null                                                        | 0.62  | -0.13 | -0.75 | -1.89 |
| ybjI | P75809 | Enzyme; Biosynthesis of cofactors, carriers: Riboflavin     | 0     | 0.34  | 0     | 0     |
| ycaO | P75838 | Null                                                        | -0.47 | 0.41  | -1.26 | 0.28  |
| ycbB | P22525 | Enzyme; Murein sacculus, peptidoglycan                      | 0.96  | -0.22 | 0     | 0     |
| ycbF | P40876 | Putative factor; Surface structures                         | 2.28  | 2.26  | 0     | 0.63  |

|      |        |                                                   |       |       |       |       |
|------|--------|---------------------------------------------------|-------|-------|-------|-------|
| ycbV | P75860 | Putative structural component; Surface structures | 0.43  | 3.11  | 0     | 0     |
| ycbW | P75862 | Null                                              | 0.17  | -0.57 | -0.22 | -0.09 |
| yccF | P0AB12 | Null                                              | 0.89  | 1.18  | 0     | 0     |
| yccV | P0AB20 | Null                                              | 0     | -1.01 | -0.63 | -1.19 |
| yccX | P0AB65 | Null                                              | 0.88  | -0.5  | 0     | 0     |
| ycdM | P75898 | Enzyme; Pyrimidine nitrogen catabolism            | 1.34  | 0.76  | 0     | 0     |
| ycdN | P75901 | Null                                              | -0.43 | 0.08  | 0     | 0     |
| ycdP | P69432 | Enzyme; Surface polysaccharides and antigens      | -0.3  | 0.91  | 0     | -0.57 |
| yceK | P0AB31 | Null                                              | 0     | -0.44 | 0     | 0     |
| ycfM | P0AB38 | Null                                              | -1.38 | -0.59 | -0.73 | -1.19 |
| ycfZ | P75961 | Putative factor; Not classified                   | 2.5   | 2.39  | 0     | 0     |
| ycgH | Null   | Phage or Prophage Related                         | 0.7   | 0.55  | -0.23 | 0.3   |
| ycgY | P76012 | Null                                              | -0.17 | 0     | 0     | 0     |
| ycil | P0AB55 | Null                                              | -0.04 | -0.6  | -0.6  | -0.65 |
| yciQ | P45848 | Null                                              | -0.52 | -1.65 | 0     | 0     |
| ycjN | P76042 | Putative transport; Not classified                | -0.57 | 1.19  | 0     | 0     |
| ycjW | P77615 | Putative regulator; Not classified                | 0.73  | 0.09  | 0     | 0     |
| ydaG | P76061 | Phage or Prophage Related                         | 0.12  | -1.28 | 0     | -1.98 |
| ydaL | P76053 | Null                                              | 0     | -1.48 | 0.77  | 0.29  |
| ydaT | P76064 | Phage or Prophage Related                         | 0.22  | -1.97 | -1.53 | -0.96 |
| ydaV | P77546 | Phage or Prophage Related                         | 0.48  | 0.28  | -0.3  | 0.68  |
| ydaW | P76066 | Phage or Prophage Related                         | -0.13 | -0.36 | 0.45  | 0.04  |
| ydbA | P33666 | Null                                              | 1.78  | 0.42  | 0     | 0     |
| ydcI | P77171 | Putative regulator; Not classified                | 0     | -1.37 | 0     | 0     |
| ydcQ | P67697 | Null                                              | -0.28 | -0.56 | 0.45  | 0.26  |
| ydcR | P77730 | Putative regulator; Not classified                | 2.89  | 1.42  | 0     | 0     |
| ydcT | P77795 | Putative transport; Not classified                | 0     | 0     | -0.29 | 0     |
| ydeA | P31122 | Transport; Transport of small molecules: sugars   | 0     | -2.08 | 0     | 0     |
| ydeN | P77318 | Putative enzyme; Not classified                   | 0.57  | 0.09  | 0.17  | -0.47 |
| ydeO | P76135 | Regulator; Not classified                         | 0     | -0.7  | 0     | 0     |
| ydeU | P32051 | Null                                              | 2.6   | 1.99  | 0     | 0     |
| ydeV | P77432 | Enzyme; Not classified                            | 1.5   | 1.14  | 0     | 0     |
| ydfB | P29009 | Phage or Prophage Related                         | -0.59 | -0.78 | -0.66 | -0.69 |
| ydfK | P76154 | Phage or Prophage Related                         | 2.55  | 1.55  | 0     | 0     |
| ydgD | P76176 | Null                                              | -1.21 | 0.35  | -0.79 | -0.15 |
| ydhS | P77148 | Putative enzyme; Not classified                   | -0.38 | -1.07 | 1.06  | 0     |
| ydiK | P0AFS7 | Null                                              | 1.36  | 0     | 0     | 0     |
| ydiV | P76204 | Null                                              | 0     | -2.23 | 0     | 0     |
| ydjN | P77529 | Putative enzyme; Not classified                   | 0.77  | -1.13 | 0     | 0     |
| yeaB | P43337 | Null                                              | 2.84  | 2.7   | -1.44 | -0.59 |
| yeaL | P0ACY6 | Null                                              | 0.72  | 0.09  | 0     | 0     |
| yeaP | P76245 | Null                                              | 0.75  | -0.08 | 0.61  | -0.41 |

|      |        |                                                              |       |       |       |       |
|------|--------|--------------------------------------------------------------|-------|-------|-------|-------|
| yeaW | P0ABR7 | Null                                                         | -0.08 | 0.33  | 0     | 0     |
| yeaX | P76254 | Putative enzyme; Not classified                              | 0.1   | 1.03  | 0     | 0.93  |
| yebU | P76273 | Enzyme; rRNA modification                                    | 0     | -1.74 | 0     | 0     |
| yebV | P64503 | Null                                                         | 0     | 0.21  | 0     | 0     |
| yecE | P37348 | Null                                                         | 0.56  | -0.31 | 0.94  | -0.2  |
| yecS | P0AFT2 | Putative transport; Not classified                           | -1.22 | 0     | 0     | 0     |
| yedQ | P76330 | Null                                                         | -0.9  | 0.19  | -1.34 | -1.38 |
| yedY | P76342 | Putative enzyme; Not classified                              | -0.07 | -0.98 | 0     | -0.29 |
| yedZ | P76343 | Null                                                         | 3.62  | 3.43  | 0     | 0     |
| yeeA | P33011 | Null                                                         | 0.9   | 1.71  | 0     | 0     |
| yeeO | P76352 | Null                                                         | 0.47  | -0.47 | 0     | -1.5  |
| yeeY | P76369 | Putative regulator; Not classified                           | -0.54 | -1.99 | 0     | 0     |
| yegl | P76393 | Putative enzyme; Not classified                              | 0     | -0.15 | 0.15  | -1.65 |
| yegL | P76396 | Null                                                         | -0.18 | -0.18 | 0.31  | -0.84 |
| yegP | P76402 | Null                                                         | 0.03  | -0.19 | -0.18 | -0.58 |
| yegX | P76421 | Null                                                         | -0.15 | 0     | 0     | 0     |
| yehL | P33348 | Null                                                         | 0     | -1.89 | 0     | 0     |
| yehS | P33355 | Null                                                         | -0.51 | 0     | 0     | 0     |
| yeiB | P25747 | Null                                                         | 2.41  | 3.2   | 0     | 0     |
| yeiJ | P33021 | Putative transport; Not classified                           | 0.31  | 1.55  | 0     | 0     |
| yeiW | P0AFT8 | Null                                                         | 1.07  | 1.42  | 0.75  | -1.26 |
| yfaO | P52006 | Null                                                         | 3.1   | 2.76  | 0     | 0     |
| yfbG | P77398 | Putative enzyme; Not classified                              | 0.29  | 1.14  | 2.31  | 2.14  |
| yfbL | P76482 | Putative enzyme; Not classified                              | -1.96 | -0.32 | 0     | 0     |
| yfbT | P77625 | Putative enzyme; Not classified                              | -2.52 | -2.33 | 0     | 0     |
| yfcl | P77768 | Null                                                         | -1.08 | 1.85  | 0     | 0     |
| yfcU | P77196 | Putative membrane; Not classified                            | 0     | -2.23 | 0     | 0     |
| yfdC | P37327 | Putative transport; Not classified                           | 1.29  | -0.29 | 0     | -0.45 |
| yfdN | P76510 | Phage or Prophage Related                                    | 0.83  | 0.82  | 0.17  | -1.54 |
| yfeO | P67729 | Null                                                         | 1.18  | -0.59 | 0     | 0     |
| yfeX | P76536 | Enzyme; Transport of small molecules: Cations                | 0     | -2.7  | 0     | 0     |
| yfgF | P77172 | Enzyme; Not classified                                       | 1.02  | -0.12 | 0     | -0.63 |
| yfgG | P64545 | Null                                                         | 0     | 0.74  | 0.3   | 0.22  |
| yfgH | P65290 | Putative membrane; Not classified                            | 0.3   | -0.3  | 0     | 0     |
| yfgJ | P76575 | Null                                                         | 0     | -1.51 | 0     | 0     |
| yfhB | P0AD42 | Enzyme; Macromolecule synthesis, modification: Phospholipids | 2.3   | 1.06  | 1.17  | 0.62  |
| yfhD | P0AGC5 | Enzyme; Transporter; Not classified                          | 2.57  | 1.34  | 0     | -0.98 |
| yfhK | P52101 | Putative regulator; Not classified                           | 1.74  | 0.86  | 0     | 0     |
| yfhR | P77538 | Putative enzyme; Not classified                              | 0.15  | 0.42  | 0     | 0     |
| yfiL | P11289 | Null                                                         | 0.95  | 0.58  | 0     | 0     |
| yfjM | P52128 | Phage or Prophage Related                                    | -1.92 | -1.63 | 0     | -0.1  |
| yfjZ | P52141 | Phage or Prophage Related                                    | -3.88 | -3.16 | 0.96  | 1.19  |
| ygaX | P76628 | Putative transport; Not classified                           | 0.47  | -0.19 | 0     | 0     |

|      |        |                                                                                    |       |       |       |       |
|------|--------|------------------------------------------------------------------------------------|-------|-------|-------|-------|
| ygbA | P25728 | Null                                                                               | -1.47 | -1.24 | 0     | 0     |
| ygbJ | Q46888 | Putative enzyme; Not classified                                                    | 0     | 0.05  | 0     | 0     |
| ygcS | Q46909 | Putative transport; Not classified                                                 | 0     | 0.08  | 0     | 0     |
| ygcU | Q46911 | Null                                                                               | 2.37  | 1.18  | 0     | 0     |
| ygdH | P0ADR8 | Null                                                                               | 0.01  | -0.85 | -0.15 | 0.12  |
| ygfM | P64557 | Null                                                                               | -0.05 | -1.75 | 0     | 0     |
| yggF | P21437 | Null                                                                               | 1.51  | 2.13  | 0     | 0     |
| ygiC | P0ADT5 | Putative enzyme; Not classified                                                    | 0     | -1.65 | 0     | 0     |
| ygiE | P0A8H3 | Null                                                                               | -1.17 | 0.31  | -1.34 | -0.11 |
| ygiL | P39834 | Putative structural component; Surface structures                                  | 0     | -0.03 | 0     | 0     |
| ygiS | Q46863 | Putative transport; Not classified                                                 | 0     | 1.78  | 0     | 0     |
| ygiJ | P42590 | Orf; Not classified                                                                | 0.64  | 0.21  | 1.07  | 1.07  |
| ygiK | P42592 | Enzyme; Not classified                                                             | 0     | 0.03  | 0     | 0     |
| yhal | P64592 | Putative carrier; Not classified                                                   | 0.91  | 0.08  | 0     | 0     |
| yhbG | P0A9V1 | Putative transport; Not classified                                                 | -2.22 | -0.97 | -1.12 | 0     |
| yhbH | P0AFX0 | Putative regulator; Global regulatory functions                                    | 0     | -2.03 | 0     | 0     |
| yhcB | P0ADW3 | Null                                                                               | -1.14 | -0.49 | -0.48 | -0.28 |
| yhcE | P45421 | Null                                                                               | 1.03  | 0.29  | 0.34  | 0     |
| yhcE | P45421 | Null                                                                               | 2.94  | 3.48  | 0     | 0.15  |
| yhcG | P45423 | Null                                                                               | -0.76 | 0     | 0     | 0     |
| yhcM | P64612 | Enzyme; Not classified                                                             | 0     | -1.26 | 0     | 0     |
| yhcO | P64616 | Null                                                                               | 0.29  | 0.74  | 0     | 0     |
| yhdH | P26646 | Putative enzyme; Not classified                                                    | 0     | 0.12  | 0     | 0     |
| yhdX | P45767 | Putative transport; Not classified                                                 | -0.88 | 0     | 0     | 0     |
| yhgE | P45804 | Putative transport; Not classified                                                 | 0     | -0.59 | 0     | 0     |
| yhhW | P46852 | Null                                                                               | -0.3  | -0.87 | -1.16 | -0.41 |
| yhiN | P37631 | Putative enzyme; Not classified                                                    | 1.2   | 0.7   | 1.04  | 0.72  |
| yhiQ | P68567 | Enzyme; rRNA modification                                                          | -0.14 | -0.37 | -0.22 | -1    |
| yiaN | P37675 | Transport; Transport of small molecules:<br>Carbohydrates, organic acids, alcohols | 0     | 0.28  | 0.35  | 0     |
| yiaT | P37681 | Putative membrane; Not classified                                                  | -2.96 | -0.99 | 0     | -1.63 |
| yidG | P0ADL6 | Null                                                                               | -2.19 | -0.69 | 0.15  | -1.03 |
| yidZ | P31463 | Putative regulator; Not classified                                                 | -0.93 | 0.36  | 1.39  | 0.31  |
| yifK | P27837 | Putative transport; Not classified                                                 | -0.43 | -1.11 | -0.36 | 0.08  |
| yihS | P32140 | Enzyme; Not classified                                                             | -0.49 | -0.51 | 0.11  | -0.8  |
| yihX | P0A8Y3 | Enzyme; Not classified                                                             | 0.92  | -0.1  | -0.3  | 0     |
| yiiT | P0AAB8 | Putative regulator; Not classified                                                 | -1.21 | 0.04  | -0.27 | -1.02 |
| yijF | P32668 | Null                                                                               | 0.44  | 0.37  | 0.44  | 0.31  |
| yjaB | P09163 | Null                                                                               | 0     | 0.77  | 0     | 0     |
| yjaG | P32680 | Null                                                                               | -0.68 | -0.89 | -0.42 | -0.6  |
| yjaH | P32681 | Null                                                                               | -0.22 | -0.63 | -0.33 | -0.62 |
| yjcQ | P32715 | Orf; Not classified                                                                | 0     | -0.51 | 0     | 0     |
| yjeK | P39280 | Enzyme; Protein modification                                                       | 0.66  | 0.44  | 0.4   | -0.7  |
| yjfK | P39293 | Null                                                                               | 0.19  | -0.53 | 0     | 0     |

|      |        |                                                                 |       |       |       |       |
|------|--------|-----------------------------------------------------------------|-------|-------|-------|-------|
| yjgK | P0AF96 | Putative enzyme; Not classified                                 | -0.12 | -0.18 | 0.13  | 0.11  |
| yjgM | P39337 | Null                                                            | 0     | 0.62  | 0     | 0     |
| yjgZ | P39351 | Null                                                            | 0.34  | 0.4   | -1.91 | 0.87  |
| yjhF | P39357 | Putative transport; Not classified                              | 0     | -0.77 | -0.12 | 0.6   |
| yjiM | P39384 | Null                                                            | 2.26  | 1.08  | 2.03  | 0     |
| yjiN | P39385 | Null                                                            | 0.3   | 0.09  | 0.19  | 0.33  |
| yjiR | P39389 | Putative regulator; Not classified                              | -0.35 | 0.14  | 0     | -1.69 |
| yjiW | P39394 | Null                                                            | 0     | -2.6  | 0     | 0     |
| yjjG | P0A8Y1 | Enzyme; Degradation of small molecules: Nucleotides             | 3.36  | 1.94  | 3.03  | 0.9   |
| yjjP | P0ADD5 | Putative structure; Not classified                              | 0     | -0.58 | 0     | 0     |
| yjjU | P39407 | Null                                                            | -0.49 | -0.36 | 0     | 0     |
| yjjY | P0ADD9 | Null                                                            | 3.18  | 2.19  | 0     | 0     |
| ykfB | P77162 | Phage or Prophage Related                                       | 0     | -2.02 | 0     | 0     |
| ykfC | Q47688 | Phage or Prophage Related                                       | 2.81  | 2.42  | 0     | 0     |
| ykfF | P75677 | Phage or Prophage Related                                       | 1.9   | 1.8   | 0     | 0     |
| ykfl | P77692 | Phage or Prophage Related                                       | -0.53 | 1.24  | 0     | 0     |
| ykgB | P75687 | Null                                                            | 2.95  | 2.91  | 0     | 0     |
| ykgE | P77252 | Putative carrier; Energy metabolism, carbon: Electron transport | 1.32  | 1.15  | 0     | 0     |
| ykgF | P77536 | Putative carrier; Energy metabolism, carbon: Electron transport | 0.19  | 0     | 0     | 0     |
| yliE | P75800 | Null                                                            | 0.04  | -0.72 | 0     | 0     |
| ymcD | P75885 | Null                                                            | -2.36 | 0.49  | -0.88 | 0     |
| ymdB | P0A8D6 | Null                                                            | -0.74 | -1.28 | 0     | 0     |
| ymdF | P56614 | Null                                                            | 0     | -0.91 | 0     | -0.59 |
| ymfL | P75976 | Phage or Prophage Related                                       | 0.17  | -0.37 | 0.02  | 0.59  |
| ymfM | P75977 | Phage or Prophage Related                                       | 1.41  | -0.13 | -0.41 | -0.42 |
| ymfO | P75980 | Phage or Prophage Related                                       | 1.3   | 0.95  | -1.6  | 0     |
| ymfP | P75981 | Phage or Prophage Related                                       | 0     | 1.94  | 0     | 0     |
| ymfR | P75979 | Phage or Prophage Related                                       | -0.71 | -0.22 | 0     | 0     |
| ymgF | P58034 | Null                                                            | 0     | -0.09 | 0     | 0     |
| ynaE | P76073 | Phage or Prophage Related                                       | 2.55  | 1.55  | 0     | 0     |
| ynal | P0AEB5 | Null                                                            | 1.23  | 0.36  | 0     | 0     |
| yncB | P76113 | Enzyme; Not classified                                          | 0     | -1.22 | -2.02 | -0.68 |
| yncC | P76114 | Putative regulator; Not classified                              | -0.05 | -0.97 | 0     | 0     |
| yncE | P76116 | Putative factor; Not classified                                 | 0.28  | -0.43 | 0.29  | 0.85  |
| yncH | P76118 | Null                                                            | -1.46 | -1.75 | 0     | 0     |
| yncK | Null   | Phage or Prophage Related                                       | 2.8   | 2.39  | 0     | 0     |
| yneE | P76146 | Null                                                            | 0.82  | 0.82  | -0.43 | 0.22  |
| yneF | P76147 | Null                                                            | 0.27  | -1.53 | 0     | 0     |
| ynel | P76149 | Putative enzyme; Not classified                                 | 0.05  | -0.39 | 0     | 0     |
| yneK | P76150 | Null                                                            | -0.53 | 0.17  | 0     | 0     |
| ynfD | P76172 | Null                                                            | -0.37 | -0.78 | -0.38 | -1.39 |
| ynfH | P76173 | Putative enzyme; Degradation of small molecules:                | -2.12 |       | 1.35  | 2.35  |



|      |        | Carbon compounds                                         |       |       |       |       |
|------|--------|----------------------------------------------------------|-------|-------|-------|-------|
| ynfN | P76157 | Phage or Prophage Related                                | 2.98  | 2.21  | 0.12  | 0.69  |
| ynhG | P76193 | Enzyme; Murein sacculus, peptidoglycan                   | -0.18 | -0.64 | -0.57 | -1.38 |
| ynjB | P76223 | Null                                                     | 0     | -0.49 | 0     | 0     |
| ynjH | P76227 | Null                                                     | -0.85 | -0.57 | 0     | 0     |
| ynjI | P76228 | Null                                                     | 2.47  | 2.3   | 0     | 0     |
| yoaB | POAEB7 | Putative enzyme; Not classified                          | 2.21  | 1.87  | 0     | 0     |
| yoeA | P76356 | Phage or Prophage Related                                | 1.84  | -0.84 | 0     | 0     |
| yoeB | P69348 | Null                                                     | -0.15 | -1.06 | 0     | 0     |
| yohD | P33366 | Null                                                     | 1.34  | 2.39  | 0     | 0     |
| ypfG | P76559 | Null                                                     | -1.26 | -2.51 | 0     | 0     |
| ypfN | Q2EET2 | Null                                                     | 0.59  | 0.04  | 0.22  | 0     |
| yqfA | P67153 | Putative enzyme; Not classified                          | 0     | -1.72 | 0     | 0     |
| yqgB | P64567 | Null                                                     | 0.34  | -0.17 | -1.48 | -1.07 |
| yqgC | P64570 | Null                                                     | 0.92  | 1.33  | 0     | 0     |
| yqhD | Q46856 | Enzyme; Degradation of small molecules: Carbon compounds | 0     | -0.25 | -0.2  | -1.08 |
| yqhG | Q46858 | Null                                                     | -0.02 | -0.77 | -0.54 | -0.36 |
| yqjK | Q47710 | Null                                                     | 0     | -2.97 | 0     | 0     |
| yrbC | P0ADV7 | Transport; Transport of small molecules: phospholipids   | 3.04  | 2.09  | 0     | 0     |
| yrfF | P45800 | Putative factor; Not classified                          | 1.19  | -1.18 | 0     | 0     |
| ytjC | P0A7A2 | Enzyme; Not classified                                   | 0     | -1.71 | 0     | 0     |
| yaaA | P0A8I3 | Null                                                     | -0.28 | 0.15  | 0.44  | -1.54 |
| zraR | P14375 | Regulator; Energy metabolism, carbon: Fermentation       | 0.24  | 0.51  | 0.14  | -1.66 |

**Table SVIII: List of genes with a high flux phenotype, ordered by 1 % high flux value**

| Gene name | Locus tag | Function                                                                       | 1 % low flux | 5 % low flux | 5 % high flux | 1 % high flux |
|-----------|-----------|--------------------------------------------------------------------------------|--------------|--------------|---------------|---------------|
| ynfH      | P76173    | Putative enzyme; Degradation of small molecules: Carbon compounds              | -2.12        |              | 2.35          | 1.35          |
| rpiA      | P0A7Z0    | Enzyme; Central intermediary metabolism: Non-oxidative branch, pentose pathway | -2.24        | -1.97        | 2.2           | 1.22          |
| ompC      | P06996    | Membrane; Outer membrane constituents                                          | -1.11        | -0.72        | 1.26          | 1.02          |

**Table SIX: List of genes with a low flux phenotype, ordered by 1% low flux value**

| Gene name | Locus tag | Function                                                                         | 1 % low flux | 5 % low flux | 5 % high flux | 1 % high flux |
|-----------|-----------|----------------------------------------------------------------------------------|--------------|--------------|---------------|---------------|
| aceK      | P11071    | Enzyme; Central intermediary metabolism: Glyoxylate bypass                       | 3.95         | 2.43         | 0             | 0             |
| adhP      | P39451    | Enzyme; Energy metabolism, carbon: Anaerobic respiration                         | 3.87         | 3.73         | 0             | 0             |
| nanK      | P45425    | Putative regulator; Not classified                                               | 3.85         | 2.98         | 0             | 0             |
| ybaL      | P39830    | Putative transport; Not classified                                               | 3.71         | 4.00         | 0             | 0             |
| gatC      | P69831    | Transport; Transport of small molecules: Carbohydrates, organic acids, alcohols  | 3.66         | 3.28         | 0             | 0             |
| yedZ      | P76343    | Null                                                                             | 3.62         | 3.43         | 0             | 0             |
| rimJ      | P0A948    | Enzyme; Ribosomes - maturation and modification                                  | 3.51         | 2.73         | 0             | 0             |
| ppk       | P0A7B1    | Enzyme; Central intermediary metabolism: Phosphorus compounds                    | 3.23         | 3.04         | 0             | 0.44          |
| fliM      | P06974    | Structural component; Surface structures                                         | 3.22         | 2.01         | 0             | 0             |
| yjjY      | P0ADD9    | Null                                                                             | 3.18         | 2.19         | 0             | 0             |
| yafT      | P77339    | Putative enzyme; Not classified                                                  | 3.17         | 2.21         | 0             | 0             |
| ulaE      | P39305    | Putative enzyme; Central intermediary metabolism: Pool, multipurpose conversions | 3.12         | 1.97         | 0.22          | 0.36          |
| yfaO      | P52006    | Null                                                                             | 3.10         | 2.76         | 0             | 0             |
| stfQ      | P77515    | Phage or Prophage Related                                                        | 3.07         | 2.67         | 0             | -0.17         |
| stfR      | P76072    | Phage or Prophage Related                                                        | 3.07         | 2.67         | 0             | -0.17         |
| flhB      | P76299    | Structural component; Not classified                                             | 3.07         | 2.18         | 0             | 0             |
| yrbC      | P0ADV7    | Transport; Transport of small molecules: phospholipids                           | 3.04         | 2.09         | 0             | 0             |
| fliO      | P22586    | Putative structure; Surface structures                                           | 2.98         | 2.38         | 0.01          | -0.48         |
| ykgB      | P75687    | Null                                                                             | 2.95         | 2.91         | 0             | 0             |
| pcm       | P0A7A5    | Enzyme; Proteins - translation and modification                                  | 2.95         | 2.69         | 0             | 0             |
| gatA      | P69828    | Enzyme; Transport of small molecules: Carbohydrates, organic acids, alcohols     | 2.94         | 3.48         | 0.15          | 0             |
| dcuC      | P0ABP3    | Transport; Transport of small molecules: Carbohydrates, organic acids, alcohols  | 2.94         | 3.48         | 0.15          | 0             |
| yhcE      | P45421    | Null                                                                             | 2.94         | 3.48         | 0.15          | 0             |
| alsK      | P32718    | Putative regulator; Not classified                                               | 2.94         | 3.48         | 0.15          | 0             |
| phnC      | P16677    | Transport; Central intermediary metabolism: Phosphorus compounds                 | 2.90         | 2.59         | -1.23         | 0             |
| ydcR      | P77730    | Putative regulator; Not classified                                               | 2.89         | 1.42         | 0             | 0             |
| fsaA      | P78055    | Null                                                                             | 2.88         | 2.45         | 0             | 0.58          |
| yeaB      | P43337    | Null                                                                             | 2.84         | 2.70         | -0.59         | -1.44         |
| paal      | P76084    | Enzyme; Phenylacetic acid degradation                                            | 2.82         | 2.13         | -1.09         | 0.06          |
| ykfC      | Q47688    | Phage or Prophage Related                                                        | 2.81         | 2.42         | 0             | 0             |
| ynck      | Null      | Phage or Prophage Related                                                        | 2.80         | 2.39         | 0             | 0             |

|      |        |                                                                 |      |      |       |       |
|------|--------|-----------------------------------------------------------------|------|------|-------|-------|
| rssA | P0AFR0 | Null                                                            | 2.78 | 2.52 | 0     | 0     |
| mhpT | P77589 | Putative transport; Not classified                              | 2.76 | 2.54 | -2.38 | -2.45 |
| yagM | P71296 | Phage or Prophage Related                                       | 2.75 | 2.09 | 0     | 0     |
| dusB | P0ABT5 | Enzyme; tRNA modification                                       | 2.74 | 2.12 | -1.60 | 0     |
| chbG | P37794 | Enzyme; Degradation of small molecules: N,N'-diacetylchitobiose | 2.62 | 2.31 | 0     | 0     |
| ydeU | P32051 | Null                                                            | 2.60 | 1.99 | 0     | 0     |
| uxuB | P39160 | Enzyme; Degradation of small molecules: Carbon compounds        | 2.59 | 2.71 | 0     | 0     |
| yagP | P75684 | Putative regulator; Not classified                              | 2.57 | 3.18 | 0     | 0     |
| yfhD | P0AGC5 | Enzyme; Transporter; Not classified                             | 2.57 | 1.34 | -0.98 | 0     |
| ydfK | P76154 | Phage or Prophage Related                                       | 2.55 | 1.55 | 0     | 0     |
| ynaE | P76073 | Phage or Prophage Related                                       | 2.55 | 1.55 | 0     | 0     |
| ycfZ | P75961 | Putative factor; Not classified                                 | 2.50 | 2.39 | 0     | 0     |
| cmr  | P0AEY8 | Transport; Transport of small molecules: Other                  | 2.48 | 1.86 | -3.38 | -2.39 |
| ynjI | P76228 | Null                                                            | 2.47 | 2.30 | 0     | 0     |
| ybeL | P0AAT9 | Phenotype; Not classified                                       | 2.44 | 0.86 | 0     | 0     |
| yafL | Q47151 | Putative membrane; Not classified                               | 2.43 | 1.46 | 0     | 0     |
| yeiB | P25747 | Null                                                            | 2.41 | 3.20 | 0     | 0     |
| ygcU | Q46911 | Null                                                            | 2.37 | 1.18 | 0     | 0     |
| dcp  | P24171 | Enzyme; Degradation of proteins, peptides, glyco                | 2.26 | 1.68 | 0     | 0     |
| yoaB | P0AEB7 | Putative enzyme; Not classified                                 | 2.21 | 1.87 | 0     | 0     |
| flgK | P33235 | Structural component; Surface structures                        | 2.20 | 2.59 | 0     | 0     |
| ulaF | P39306 | Putative enzyme; Not classified                                 | 2.19 | 1.16 | 0     | 0     |
| ybhP | P0AAW1 | Null                                                            | 2.12 | 2.05 | 0     | -0.37 |
| cheW | P0A964 | Regulator; Chemotaxis and mobility                              | 2.02 | 1.15 | 0     | 0     |
| envY | P10805 | Structural component; Outer membrane constituents               | 1.95 | 1.73 | -1.46 | 0     |
| ssuD | P80645 | Null                                                            | 1.94 | 0.95 | 0     | -0.42 |
| ykfF | P75677 | Phage or Prophage Related                                       | 1.90 | 1.80 | 0     | 0     |
| ybcD | P77528 | Phage or Prophage Related                                       | 1.86 | 0.57 | 0     | 0     |
| yafN | Q47156 | Null                                                            | 1.81 | 1.53 | 0     | 0     |
| fliP | P0AC05 | Putative structure; Surface structures                          | 1.75 | 1.17 | 0     | 0     |
| yfhK | P52101 | Putative regulator; Not classified                              | 1.74 | 0.86 | 0     | 0     |
| hipA | P23874 | Enzyme; Protein modification                                    | 1.72 | 1.45 | 0     | -2.48 |
| nohA | P31061 | Phage or Prophage Related                                       | 1.72 | 1.08 | 0     | 0     |
| flgG | P0ABX5 | Structural component; Surface structures                        | 1.66 | 1.69 | -0.31 | 0.37  |
| yggF | P21437 | Null                                                            | 1.51 | 2.13 | 0     | 0     |
| oppD | P76027 | Transport; Not classified                                       | 1.50 | 0.85 | 0     | 0     |
| ydeV | P77432 | Enzyme; Not classified                                          | 1.50 | 1.14 | 0     | 0     |
| hyfJ | P77453 | Putative factor; Not classified                                 | 1.46 | 0.79 | 0     | 0     |
| aceB | P08997 | Enzyme; Central intermediary metabolism: Glyoxylate bypass      | 1.36 | 0.35 | 0     | 0     |

|       |        |                                                                                                           |       |      |       |       |
|-------|--------|-----------------------------------------------------------------------------------------------------------|-------|------|-------|-------|
| yohD  | P33366 | Null                                                                                                      | 1.34  | 2.39 | 0     | 0     |
| ycdM  | P75898 | Enzyme; Pyrimidine nitrogen catabolism<br>Putative carrier; Energy metabolism, carbon: Electron transport | 1.34  | 0.76 | 0     | 0     |
| ykgE  | P77252 | Phage or Prophage Related                                                                                 | 1.32  | 1.15 | 0     | 0     |
| ymfO  | P75980 | Null                                                                                                      | 1.30  | 0.95 | 0     | -1.60 |
| yahG  | P77221 | Enzyme; Biosynthesis of cofactors, carriers: Menaquinone, ubiquinone                                      | 1.23  | 0.96 | 0     | 0     |
| menE  | P37353 | Enzyme; Amino acid biosynthesis: Lysine                                                                   | 1.15  | 1.72 | 0     | 0     |
| asd   | P0A9Q9 | Enzyme; Salvage of nucleosides and nucleotides                                                            | 1.13  | 0.95 | 0     | -0.25 |
| deoC  | P0A6L0 | Enzyme; Central intermediary metabolism: Glyoxylate bypass                                                | 1.10  | 1.20 | -0.70 | 0.16  |
| aceA  | P0A9G6 | Null                                                                                                      | 0.98  | 1.31 | 0     | 0     |
| yfiL  | P11289 | Enzyme; Fatty acid and phosphatidic acid biosynthesis                                                     | 0.95  | 0.58 | 0     | 0     |
| cfa   | P0A9H7 | Null                                                                                                      | 0.94  | 0.71 | 0     | 0     |
| ybaA  | P0AAQ6 | Null                                                                                                      | 0.93  | 1.44 | -1.65 | -1.40 |
| yqgC  | P64570 | Null                                                                                                      | 0.92  | 1.33 | 0     | 0     |
| yeeA  | P33011 | Null                                                                                                      | 0.90  | 1.71 | 0     | 0     |
| yccF  | P0AB12 | Regulator; Purine ribonucleotide biosynthesis                                                             | 0.89  | 1.18 | 0     | 0     |
| purR  | P0ACP7 | Phage or Prophage Related                                                                                 | 0.83  | 0.81 | -0.61 | -0.65 |
| yfdN  | P76510 | Null                                                                                                      | 0.83  | 0.82 | -1.54 | 0.17  |
| yneE  | P76146 | Phenotype; Not classified                                                                                 | 0.82  | 0.82 | 0.22  | -0.43 |
| asr   | P36560 | Null                                                                                                      | 0.77  | 2.22 | 0     | 0     |
| yahO  | P75694 | Phage or Prophage Related                                                                                 | 0.71  | 2.39 | 0     | 0     |
| ycgH  | Null   | Regulator; Central intermediary metabolism: Pool, multipurpose conversions                                | 0.70  | 0.55 | 0.30  | -0.23 |
| cynR  | P27111 | Regulator; Not classified                                                                                 | 0.70  | 1.24 | 0     | 0     |
| pphA  | P55798 | Putative enzyme; Not classified                                                                           | 0.67  | 0.66 | -0.94 | 0     |
| gatZ  | POC8J8 | Enzyme; Global regulatory functions                                                                       | 0.60  | 0.57 | 0     | 0     |
| kdpD  | P21865 | Regulator; Degradation of small molecules: Carbon compounds                                               | 0.55  | 0.96 | -0.23 | 0.25  |
| galS  | P25748 | Regulator; Degradation of small molecules: Carbon compounds                                               | 0.28  | 2.00 | -0.86 | -2.82 |
| *galR | P03024 | Regulator; Degradation of small molecules: Carbon compounds                                               | -0.74 | 1.60 | -0.73 | -2.14 |

\* Not enriched in 1% low-flux pool

**Table SX** Growth rate and OD600 after 16 hours of growth in M9 minimal medium containing 5 g/l galactose. The genes were chosen based on their enrichment in the 1% low flux or 1% high flux pools, respectively. Intracellular FBP concentrations of the identified mutants.

| Deletion / strain name   | max growth rate (h <sup>-1</sup> ) | OD <sub>600</sub> *) | Intracellular FBP concentration (from Fuhrer et al. 2017) |
|--------------------------|------------------------------------|----------------------|-----------------------------------------------------------|
| Wild type                | 0.223 ± 0.06                       | 0.14 ± 0.044         | 0.2737                                                    |
| <b>Low flux pool</b>     |                                    |                      |                                                           |
| <i>ΔybaL</i>             | 0.245 ± 0.001                      | 0.10 ± 0.001         | 0.2271                                                    |
| <i>Δppk</i>              | 0.231 ± 0.009                      | 0.13 ± 0.01          | -1.1933                                                   |
| <i>ΔyjjY</i>             | 0.269 ± 0.017                      | 0.09 ± 0.001         | -0.4365                                                   |
| <i>ΔaceK</i>             | 0.215 ± 0.009                      | 0.13 ± 0.01          | 0.4666                                                    |
| <i>ΔfliM</i>             | 0.203 ± 0.021                      | 0.10 ± 0.003         | -0.1543                                                   |
| <i>ΔyedZ</i>             | 0.214 ± 0.009                      | 0.11 ± 0.004         | 0.3831                                                    |
| <i>ΔgatC</i>             | 0.216 ± 0.000                      | 0.17 ± 0.06          | -0.1027                                                   |
| <i>ΔnanK</i>             | 0.213 ± 0.000                      | 0.19 ± 0.21          | 0.1724                                                    |
| <i>ΔadhP</i>             | 0.221 ± 0.007                      | 0.16 ± 0.02          | -0.1064                                                   |
| <i>ΔrimJ</i>             | 0.225 ± 0.002                      | 0.11 ± 0.01          | -0.7655                                                   |
| <b>High flux pool</b>    |                                    |                      |                                                           |
| <i>ΔompC</i>             | 0.356 ± 0.006                      | 0.51 ± 0.07          | 2.4256                                                    |
| <i>ΔrpiA</i>             | 0.308 ± 0.005                      | 0.85 ± 0.44          | 0.2739                                                    |
| <i>ΔynfH<sup>c</sup></i> | 0.212 ± 0.007                      | 0.13 ± 0.02          | 0.7675                                                    |

\*) at 16 h

LOCUS pCL002\_A4\_G\_mC\_ppsp\_Scr 3934 bp DNA circular UNA 04-Mar-2014

DEFINITION

FEATURES '-----'ion/Qualifiers  
spec

primer complement(join(3923..3934,1..6))

/label=PC057

primer 1..20

pFlux  
3934 bp

/label=PC055

primer complement(131..148)

/label=PC004

primer 142..161

/label=PC033

promoter 149..290

/label=ppsp

Site 187..204

/site\_type="binding site"

/label="Cra binding site"

-35\_signal 209..214

/label="-35 region"

-10\_signal 230..235

/label="-10 region"

misc\_feature 242

/feature\_type=Misc.

/label="Transcription start"

gene 291..1007

/label=GFP

primer\_bind complement(378..397)

/label=PC045

primer\_bind 860..879

/label=PC044

primer complement(1086..1106)

/label=PC071  
primer    1100..1117  
          /label=PC069  
gene      complement(1252..1962)  
          /label=mCherry  
primer    complement(1945..1962)  
          /label=PC070  
primer    1956..1979  
          /label=PC065  
promoter  complement(1963..2111)  
          /label=ppsp  
misc\_feature  complement(2010)  
          /feature\_type=Misc.  
          /label="Transcription start"  
-10\_signal  complement(2018..2023)  
          /label="-10 region"  
-35\_signal  complement(2039..2044)  
          /label="-35 region"  
Site      complement(2049..2066)  
          /site\_type="binding site"  
          /label="Scrambled Cra binding site"  
primer    complement(2092..2111)  
          /label=PC033  
primer    2105..2123  
          /label=PC072  
primer\_bind  complement(2107..2128)  
          /label=PC0102  
rep\_origin  2112..3024  
          /label=p15A  
primer\_bind  complement(2234..2253)  
          /label=PC074

primer complement(3006..3030)

/label=PC073

primer 3025..3043

/label=PC060

gene complement(3029..3934)

/label=aadA

primer\_bind 3614..3633

/label=PC075

#### ORIGIN

1 ACTCTTCCTT TTTCAATATT ATTGAAGCAT TTATCAGGGT TATTGTCTCA TGAGCGGATA  
61 CATATTTGAA TGTATTTAGA AAAATAAACA AATAGGGGTT CCGCGCACAT TTCCCGAAA  
121 AGTGCCACCT GACGTCTAAG AAACCATTCA ACGCTGGGAT CAGTCTTAAA AAGTAAAAAA  
181 ATATATTTGC TTGAACGATT CACCGTTTTT TTCATCCGGT TAAATATGCA AAGATAAATG  
241 CGCAGAAATG TGTTTCTCAA ACCGTTTATT TATCACAAAA GGATTGTTTCG ATGAGCAAAG  
301 GAGAAGAACT TTCTACTGGA GTTGTCCCAA TTCTTGTTGA ATTAGATGGT GATGTTAATG  
361 GGCACAAATT TTCTGTCAGT GGAGAGGGTG AAGGTGATGC TACATACGGA AACTCACCC  
421 TTAAATTTAT TTGCACTACT GGAAACTAC CTGTTCCATG GCCAACACTT GTCACTACT  
481 TGACCTATGG TGTTCAATGC TTTTCCCGTT ATCCGGATCA CATGAAACGG CATGACTTTT  
541 TCAAGAGTGC CATGCCCGAA GGTTATGTAC AGGAACGCAC TATATCTTTC AAAGATGACG  
601 GGAACTACAA GACGCGTGCT GAAGTCAAGT TTGAAGGTGA TACCCTTGTT AATCGTATCG  
661 AGTTAAAGGG TATTGATTTT AAAGAAGATG GAAACATTCT CGGACACAAA CTAGAGTACA  
721 ACTATAACTC ACACAATGTA TACATCACGG CAGACAAACA AAAGAATGGA ATCAAAGCTA  
781 ACTTCAAAT TCGCCACAAC ATTGAAGATG GTTCCGTTCA ACTAGCAGAC CATTATCAAC  
841 AAAATACTCC AATTGGCGAT GGCCCTGTCC TTTTACCAGA CAACCATTAC CTGTGACAC  
901 AATCTGCCCT TTCGAAAGAT CCAACGAAA AGCGTGACCA CATGGTCCTT CTTGAGTTTG  
961 TAACTGCTGC TGGGATTACA CATGGCATGG ATGAGCTCTA CAAAtgaTAG AGGCATCAAA  
1021 TAAAACGAAA GGCTCAGTCG AAAGACTGGG CCTTTCGTTT TATCTGTTGT TTGTCGGTGA  
1081 ACGCTCTCCT GAGTAGGACA CGACCTGCAG GGAGCAGTTA AACGCAGAAA GGCCACCCG  
1141 AAGGTGAGCC AGTGTGACTC TAGTAGAGAG CGTTCACCGA CAAACAACAG ATAAAACGAA  
1201 AGGCCAGTC TTTGACTGA GCCTTTCGTT TTATTTGATG CCTGGTTATT ATTATTTGTA  
1261 CAGCTCATCC ATGCCACCGG TAGAATGACG ACCCTCCGCG CGCTCATATT GCTCTACGAT



1321 CGTATAATCT TCATTATGAG AGGTGATGTC CAGTTTAATA TTCACATTGT ACGCGCCAGG  
1381 CAGCTGCACA GGTTTCTTGG CTTTGTACGT GGTTTTCACT TCAGCGTCAT AATGGCCGCC  
1441 ATCTTTCAGT TTCAGGCGCT GTTTAATTTT GCCTTTCAGC GCACCATCTT CCGGATACAT  
1501 GCGTTCGCTA GACGCCTCCC AACCCATCGT CTTTTTCTGC ATCACCGGGC CATCAGATGG  
1561 AAAATTAGTA CCACGCAGTT TAACTTTATA GATGAACTCG CCATCCTGCA GGGAGGAGTC  
1621 CTGAGTGACG GTCACGACAC CACCATCTTC AAAATTCATT ACGCGTCCC ACTTGAAACC  
1681 TTCCGGAAAA GACAGCTTCA GATAGTCCGG GATATCCGCT GGGTGTTTAA CATACGCTTT  
1741 AGAACCGTAC ATAAATTGCG GGCTCAGGAT GTCCACGCA AAAGGCAGCG GGCCGCCTTT  
1801 AGTCACTTTC AGTTTGGCGG TCTGGGTGCC TTCATACGGA CGGCCCTCGC CTTCGCCTTC  
1861 GATCTCGAAC TCGTGACCGT TAACAGAACC CTCCATGTGA ACTTTGAAGC GCATGAACTC  
1921 TTTAATGATA GCCATGTTAT CCTCCTCGCC CTTGAAAACC ATCGAACAAT CCTTTTGTGA  
1981 TAAATGAACG GTTTGAGAAA CACATTTCTG CGCATTTATC TTTGCATATT TAACCGGATG  
2041 AAAAAAACGT CGACCCAGTA ATAGTCATAT ATTTTTTAC TTTTAAAGAC TGATCCCAGC  
2101 GTTGAATGGT TGCGCTAGCG GAGTGATAC TGGCTTACTA TGTTGGCACT GATGAGGGTG  
2161 TCAGTGAAGT GCTTCATGTG GCAGGAGAAA AAAGGCTGCA CCGGTGCGTC AGCAGAATAT  
2221 GTGATACAGG ATATATTCCG CTTCTCGCT CACTGACTCG CTACGCTCGG TCGTTCGACT  
2281 GCGGCGAGCG GAAATGGCTT ACGAACGGGG CGGAGATTTT CTGGAAGATG CCAGGAAGAT  
2341 ACTTAACAGG GAAGTGAGAG GGCCGCGGCA AAGCCGTTTT TCCATAGGCT CCGCCCCCT  
2401 GACAAGCATC ACGAAATCTG ACGCTCAAAT CAGTGGTGGC GAAACCCGAC AGGACTATAA  
2461 AGATACCAGG CGTTTCCCC TGGCGGCTCC CTCGTGCGCT CTCCTGTTCC TGCCTTTCGG  
2521 TTTACCGGTG TCATTCCGCT GTTATGGCCG CGTTTGTCTC ATTCCACGCC TGACACTCAG  
2581 TTCCGGGTAG GCAGTTCGCT CCAAGCTGGA CTGTATGCAC GAACCCCCG TTCAGTCCGA  
2641 CCGCTGCGCC TTATCCGGTA ACTATCGTCT TGAGTCCAAC CCGGAAAGAC ATGCAAAGC  
2701 ACCACTGGCA GCAGCCACTG GTAATTGATT TAGAGGAGTT AGTCTTGAAG TCATGCGCCG  
2761 GTTAAGGCTA AACTGAAAGG ACAAGTTTTG GTGACTGCGC TCCTCCAAGC CAGTTACCTC  
2821 GGTTCAAAGA GTTGGTAGCT CAGAGAACCT TCGAAAAACC GCCCTGCAAG GCGGTTTTTT  
2881 CGTTTTCAGA GCAAGAGATT ACGCGCAGAC CAAAACGATC TCAAGAAGAT CATCTTATTA  
2941 ATCAGATAAA ATATTTCTAG ATTTAGTGC AATTTATCTC TTCAAATGTA GCACCTGAAG  
3001 TCAGCCCCAT ACGATATAAG TTGTACAGTT ATTTGCCGAC TACCTTGGTG ATCTCGCCTT  
3061 TCACGTAGTG GACAAATTCT TCCAAGTAT CTGCGCGCGA GGCCAAGCGA TCTTCTTCTT  
3121 GTCCAAGATA AGCCTGTCTA GCTTCAAGTA TGACGGGCTG ATACTGGGCC GGCAGGCGCT

3181 CCATTGCCCA GTCGGCAGCG ACATCCTTCG GCGCGATTTT GCCGGTTACT GCGCTGTACC  
3241 AAATGCGGGA CAACGTAAGC ACTACATTTT GCTCATCGCC AGCCCAGTCG GGCGGCGAGT  
3301 TCCATAGCGT TAAGGTTTCA TTTAGCGCCT CAAATAGATC CTGTTTCAGGA ACCGGATCAA  
3361 AGAGTTCCTC CGCCGCTGGA CCTACCAAGG CAACGCTATG TTCTCTTGCT TTTGTCAGCA  
3421 AGATAGCCAG ATCAATGTTCG ATCGTGGCTG GCTCGAAGAT ACCTGCAAGA ATGTCATTGC  
3481 GCTGCCATTC TCCAAATTGC AGTTCGCGCT TAGCTGGATA ACGCCACGGA ATGATGTCGT  
3541 CGTGCAACAAC AATGGTGACT TCTACAGCGC GGAGAATCTC GCTCTCTCCA GGGGAAGCCG  
3601 AAGTTTCAA AAGGTCGTTG ATCAAAGCTC GCCGCGTTGT TTCATCAAGC CTTACGGTCA  
3661 CCGTAACCAG CAAATCAATA TCACTGTGTG GCTTCAGGCC GCCATCCACT GCGGAGCCGT  
3721 ACAAATGTAC GGCCAGCAAC GTCGGTTCGA GATGGCGCTC GATGACGCCA ACTACCTCTG  
3781 ATAGTTGAGT CGATACTTCG GCGATCACCG CTTCCCTCAT GATGTTTAAAC TTTGTTTTAG  
3841 GGCGACTGCC CTGCTGCGTA ACATCGTTGC TGCTCCATAA CATCAAACAT CGACCCACGG  
3901 CGTAACGCGC TTGCTGCTTG GATGCCCGAG GCAT

//

**Figure S1** Sequence of pFlux.

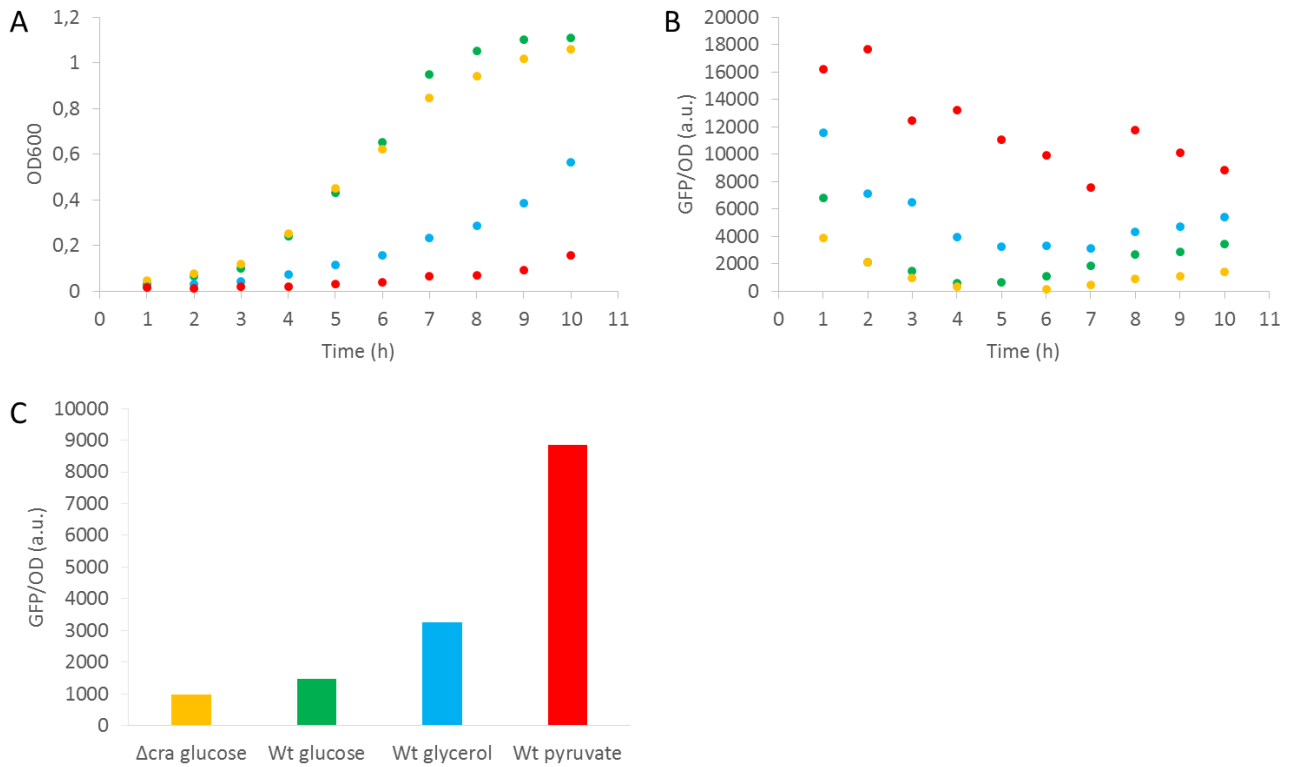

**Fig. SII** Analysis of growth and fluorescence over time in a plate reader. To identify which time point is suitable for screening by FACS at a single time point, we analysed the growth behavior and the GFP per OD in the wild type harboring pFlux growing in three different carbon sources (glucose: green, glycerol: blue and pyruvate: red), and for the *Δcra* mutant harboring pFlux in glucose (orange). **A** Growth profile of the different strains. **B** Specific fluorescence given in GFP per OD (a.u.). **C** Specific fluorescence measured at OD<sub>600</sub> = 0.13 ± 0.02

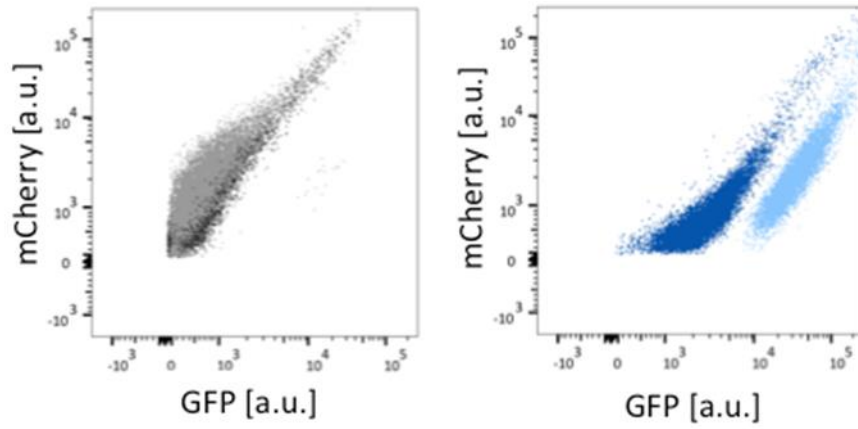

**Fig. SIII** Flow cytometry dot plots of the GFP versus RFP expression of  $\Delta cra$  (grey) and wild type strains (blue). The cells contain pFlux and were grown in the presence of glucose (dark) and pyruvate (light).

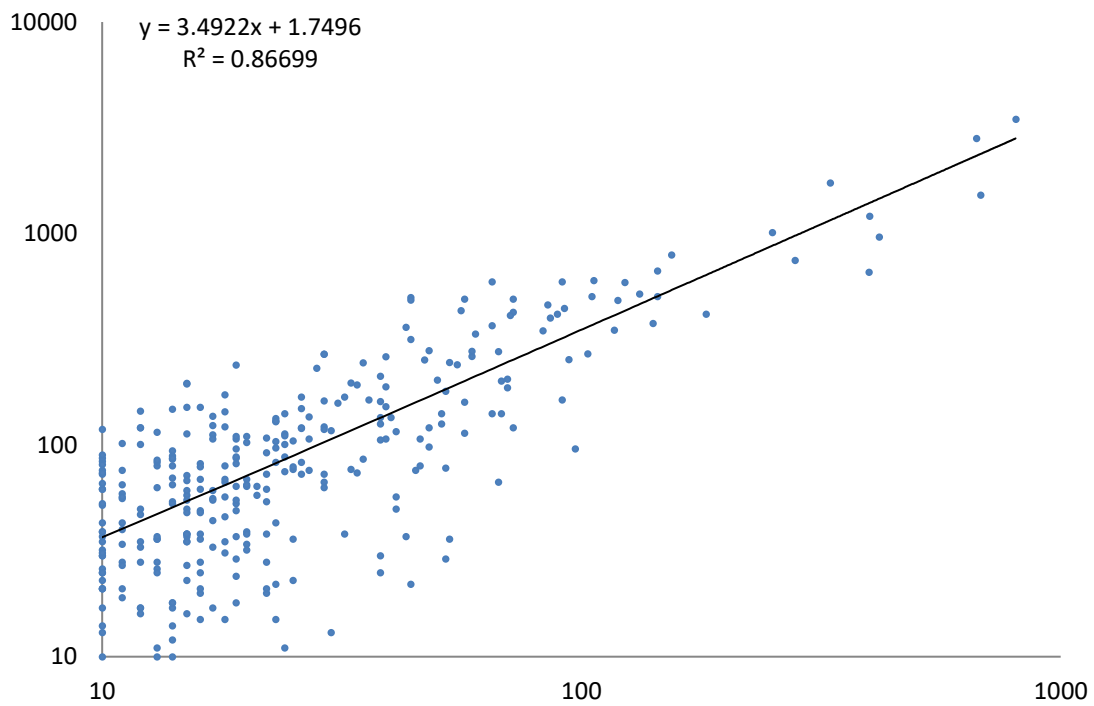

**Figure SIV** Log scale dot plot of the individual gene coverage for the duplicates of the 1 % low flux pool. Each dot represents one gene. The plot shows the raw numbers before normalization. A linear regression line is presented with a  $R^2$  of 0.86699.

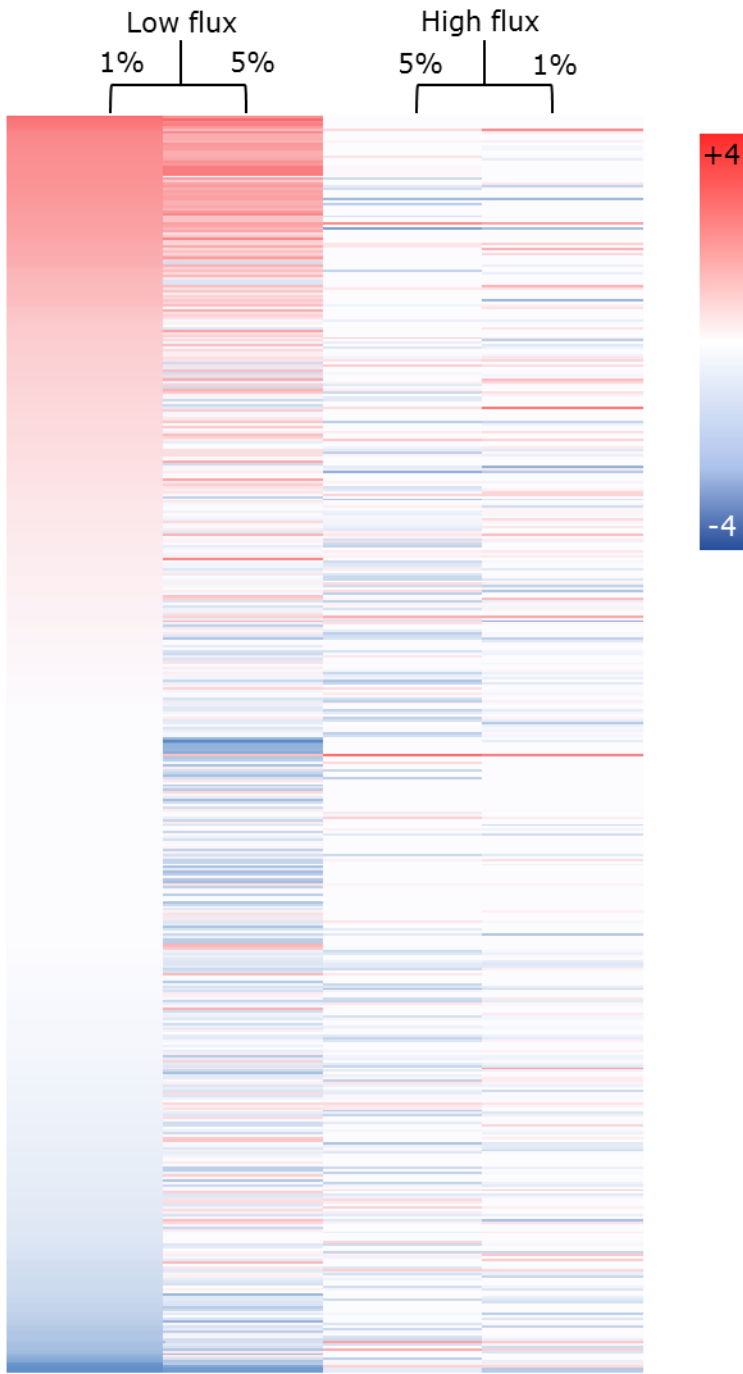

**Fig. SV** Heat map of the 504 genes identified in the low flux pools and high flux pools compared to the total knockout library. Enrichment is shown in red and depletion in blue. The genes are sorted according to their abundance in the 1% low flux pool.

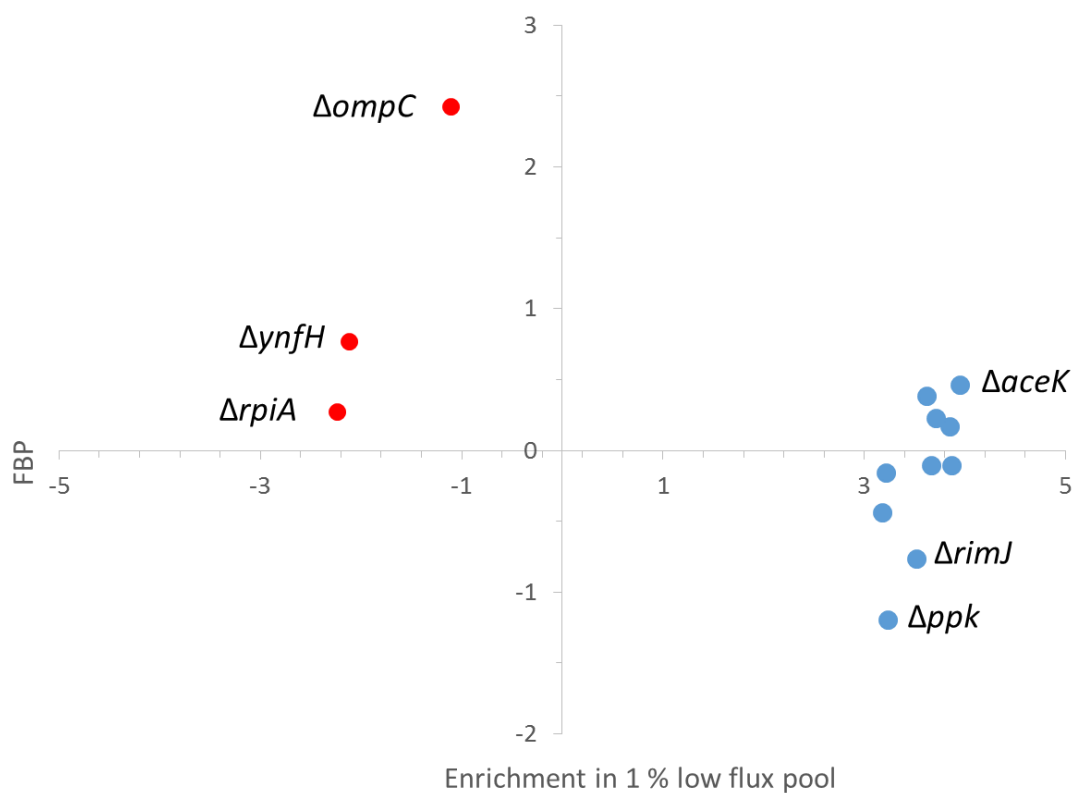

**Fig. SVI:** Comparison of the enrichment factor in the 1% low flux pool to the measured intracellular FBP concentration (a.u.) during growth on glucose (adopted from Fuhrer et al, 2017) The 10 highest enriched strains in the 1% low flux pools (blue) are shown together with the three identified mutants enriched in the high flux pools (red).
